1 **Changes in a new type of genomic accordion may open the pallets to increased**  
2 **monkeypox transmissibility**

3 Sara Monzón<sup>1#</sup>, Sarai Varona<sup>1#</sup>, Anabel Negrodo<sup>2,3#</sup>, Juan Angel Patiño-Galindo<sup>4</sup>, Santiago  
4 Vidal-Freire<sup>4</sup>, Angel Zaballos<sup>5</sup>, Eva Orviz<sup>6</sup>, Oskar Ayerdi<sup>6</sup>, Ana Muñoz-García<sup>6</sup>, Alberto  
5 Delgado-Iribarren<sup>6</sup>, Vicente Estrada<sup>3,6</sup>, Cristina García<sup>2</sup>, Francisca Molero<sup>2</sup>, Patricia  
6 Sánchez<sup>2,3</sup>, Montserrat Torres<sup>2</sup>, Ana Vázquez<sup>2,7</sup>, Juan-Carlos Galán<sup>7,8</sup>, Ignacio Torres<sup>9</sup>,  
7 Manuel Causse del Río<sup>10</sup>, Laura Merino<sup>11</sup>, Marcos López<sup>12</sup>, Alicia Galar<sup>13</sup>, Laura  
8 Cardeñoso<sup>14</sup>, Almudena Gutiérrez<sup>15</sup>, Cristina Loras<sup>16</sup>, Isabel Escribano<sup>17</sup>, Marta Elena  
9 Alvarez-Argüelles<sup>18</sup>, Leticia del Río<sup>19</sup>, María Simón<sup>20</sup>, M<sup>a</sup>Angeles Meléndez<sup>21</sup>, Juan  
10 Camacho<sup>2</sup>, Laura Herrero<sup>2</sup>, Pilar Jiménez Sancho<sup>5</sup>, Maria Luisa Navarro-Rico<sup>5</sup>, Jens H.  
11 Kuhn<sup>22</sup>, Mariano Sanchez-Lockhart<sup>23</sup>, Nicholas Di Paola<sup>23</sup>, Jeffrey R. Kugelman<sup>23</sup>, Elaina  
12 Giannetti<sup>4</sup>, Susana Guerra<sup>4,24,25</sup>, Adolfo García-Sastre<sup>4,24,26,27,28</sup>, Gustavo Palacios<sup>4,24&\*</sup>, Isabel  
13 Cuesta<sup>1&</sup>, and Maripaz P. Sánchez-Seco<sup>2,3&</sup>

14  
15  
16 <sup>1</sup>Unidad de Bioinformática, Unidades Centrales Científico Técnicas, Instituto de Salud Carlos  
17 III, 28029 Madrid, Spain

18 <sup>2</sup>Centro Nacional de Microbiología, Instituto de Salud Carlos III, 28029 Madrid, Spain

19 <sup>3</sup>Centro de Investigación Biomédica en Red de Enfermedades Infecciosas (CIBERINFEC),  
20 Instituto de Salud Carlos III, 28029 Madrid, Spain

21 <sup>4</sup>Department of Microbiology, Icahn School of Medicine at Mount Sinai, New York, NY  
22 10029, USA

23 <sup>5</sup>Unidad de Genómica, Unidades Centrales Científico Técnicas, Instituto de Salud Carlos III,  
24 28029 Madrid, Spain

25 <sup>6</sup>Centro Sanitario Sandoval, Hospital Clínico San Carlos, 28040 Madrid, Spain

- 26 <sup>7</sup>Centro de Investigación Biomédica en Red de Epidemiología y Salud Pública (CIBERESP),  
27 Instituto de Salud Carlos III, 28029 Madrid, Spain
- 28 <sup>8</sup>Servicio de Microbiología, Hospital Universitario Ramón y Cajal, Instituto Ramón y Cajal  
29 de Investigación Sanitaria (IRYCIS), 28034 Madrid, Spain
- 30 <sup>9</sup>Servicio de Microbiología, Hospital Clínico Universitario, Instituto de Investigación  
31 INCLIVA, 46010 Valencia, Spain
- 32 <sup>10</sup>Unidad de Microbiología, Hospital Universitario Reina Sofía, Instituto Maimónides de  
33 Investigación Biomédica de Córdoba, 14004 Córdoba, Spain
- 34 <sup>11</sup>Unidad Clínico de Enfermedades Infecciosas, Microbiología y Medicina Preventiva,  
35 Hospital Universitario Virgen del Rocío, 41013 Sevilla, Spain
- 36 <sup>12</sup>Servicio de Microbiología y Parasitología, Hospital Universitario Puerta de Hierro  
37 Majadahonda, 28222 Madrid, Spain
- 38 <sup>13</sup>Servicio de Microbiología Clínico y Enfermedades Infecciosas, Hospital General  
39 Universitario Gregorio Marañón, 28007 Madrid, Spain
- 40 <sup>14</sup>Servicio de Microbiología, Instituto de Investigación Sanitaria, Hospital Universitario de la  
41 Princesa, 28006 Madrid, Spain
- 42 <sup>15</sup>Servicio de Microbiología y Parasitología Clínica, Hospital Universitario La Paz, 28046  
43 Madrid, Spain
- 44 <sup>16</sup>Servicio de Microbiología, Hospital General y Universitario, 13005 Ciudad Real, Spain
- 45 <sup>17</sup>Hospital General Universitario Dr. Balmis, 03010 Alicante, Spain
- 46 <sup>18</sup>Servicio de Microbiología, Hospital Universitario Central, 33006 Asturias, Spain
- 47 <sup>19</sup>Hospital Quironsalud Torrevieja, 03184 Alicante, Spain
- 48 <sup>20</sup>Servicio de Microbiología, Hospital Central de la Defensa "Gómez Ulla", 28947 Madrid,  
49 Spain

50 <sup>21</sup>Servicio de Microbiología y Parasitología, Hospital Universitario 12 de Octubre, 28041  
51 Madrid, Spain

52 <sup>22</sup>Integrated Research Facility at Fort Detrick, National Institute of Allergy and Infectious  
53 Diseases, National Institutes of Health, Fort Detrick, Frederick, MD 21702, USA

54 <sup>23</sup>United States Army Research Institute for Infectious Disease, Fort Detrick, Frederick, MD  
55 21702, USA

56 <sup>24</sup>Global Health Emerging Pathogens Institute, Icahn School of Medicine at Mount Sinai,  
57 New York, NY 10029, USA

58 <sup>25</sup>Departamento de Medicina Preventiva, Salud Publica y Microbiología, Universidad  
59 Autónoma de Madrid, 28029 Madrid, Spain

60 <sup>26</sup>Department of Medicine, Division of Infectious Diseases, Icahn School of Medicine at  
61 Mount Sinai, New York, NY 10029, USA

62 <sup>27</sup>The Tisch Cancer Institute, Icahn School of Medicine at Mount Sinai, New York, NY  
63 10029, USA

64 <sup>28</sup>Department of Pathology, Molecular and Cell-Based Medicine, Icahn School of Medicine  
65 at Mount Sinai, New York, NY 10029, USA

66  
67 #These authors contributed equally to this work.

68  
69 &These senior authors contributed equally to this work.

70

## 71 **Correspondence**

72 \*Gustavo Palacios: [gustavo.palacios@mssm.edu](mailto:gustavo.palacios@mssm.edu)

## 73 SUMMARY

74 The currently expanding monkeypox epidemic is caused by a subclade IIb descendant of a  
75 monkeypox virus (MPXV) lineage traced back to Nigeria in 1971. In contrast to monkeypox  
76 cases caused by clade I and subclade IIa MPXV, the prognosis of current cases is generally  
77 favorable, but person-to-person transmission is much more efficient. MPXV evolution is  
78 driven by selective pressure from hosts and loss of virus–host interacting genes. However,  
79 there is no satisfactory genetic explanation using single-nucleotide polymorphisms (SNPs)  
80 for the observed increased MPXV transmissibility. We hypothesized that key genomic  
81 changes may occur in the genome’s low-complexity regions (LCRs), which are highly  
82 challenging to sequence and have been dismissed as uninformative. Using a combination of  
83 highly sensitive techniques, we determined a first high-quality MPXV genome sequence of a  
84 representative of the current epidemic with LCRs resolved at unprecedented accuracy. This  
85 effort revealed significant variation in short-tandem repeats within LCRs. We demonstrate  
86 that LCR entropy in the MPXV genome is significantly higher than that of SNPs and that  
87 LCRs are not randomly distributed. *In silico* analyses indicate that expression, translation,  
88 stability, or function of MPXV orthologous poxvirus genes (OPGs) 153, 204, and 208 could  
89 be affected in a manner consistent with the established “genomic accordion” evolutionary  
90 strategies of orthopoxviruses. Consequently, we posit that genomic studies focusing on  
91 phenotypic MPXV clade-/subclade-/lineage-/strain differences should change their focus to  
92 the study of LCR variability instead of SNP variability.

93 **Keywords**

94 *Chordopoxvirinae*, genomic accordion, low-complexity region, molecular epidemiology,  
95 monkeypox, MPX, MPXV, OPG, orthopoxvirus, *Poxviridae*, short tandem repeat, STR,  
96 transmission, genomics, bioinformatics, computational biology

## 97 INTRODUCTION

98 Monkeypox virus (MPXV) is a double-stranded DNA virus that belongs to genus  
99 *Orthopoxvirus* (varidnavirian *Nucleocytoviricota: Poxviridae: Chordopoxvirinae*) along with  
100 other human viruses, such as vaccinia virus (VACV) and variola virus (VARV) ([International](#)  
101 [Committee on Taxonomy of Viruses, 2022](#)). First encountered in 1958 in crab-eating  
102 macaques imported to Belgium ([Magnus et al., 2009](#)), MPXV has caused sporadic disease  
103 outbreaks in humans since the 1970s in Eastern, Middle, and Western Africa, totaling  
104 approximately 25,000 cases (case fatality rate 1–10%) ([Beer and Rao, 2019](#)), and also  
105 sporadic disease outbreaks among wild monkeys and apes ([Patrono et al., 2020](#); [Radonić et](#)  
106 [al., 2014](#)). Exposure to MPXV animal reservoirs, in particular rope squirrels and sun  
107 squirrels, is a significant risk factor of human infections ([Khodakevich et al., 1988](#)).

108 The human disease caused by MPXV is designated as monkeypox in the World  
109 Health Organization (WHO) International Classification of Diseases, Eleventh Revision  
110 (ICD-11; code 1E71) ([World Health Organization, 2022a](#)). Phylogenetically, historic MPXV  
111 isolates cluster into two clades ([Likos et al., 2005](#)), designated I and II ([Happi et al., 2022](#);  
112 [World Health Organization, 2022b](#)). Clade I viruses are considered more virulent and  
113 transmissible than clade II viruses ([Damon, 2011](#); [Likos et al., 2005](#); [World Health](#)  
114 [Organization, 2022b](#)).

115 Since May 2022, multiple European countries have reported a continuously increasing  
116 number of MPXV infections and associated disease, including clusters of cases associated  
117 with potential superspreading events in Belgium, Spain, and the United Kingdom (UK). As of  
118 September 30, 2022, a total of 68,428 cases had been reported in 106  
119 countries/territories/areas in all six WHO regions. Of these, 67,739 were in 99 countries that  
120 have not reported MPXV infections prior to 2022 ([Centers for Disease Control and](#)  
121 [Prevention, 2022](#)). This rapid increase in infections prompted WHO to declare this epidemic

122 a Public Health Emergency of International Concern (PHEIC) ([Nuzzo et al., 2022](#)). The  
123 viruses of the 2022 epidemic belong to subclade IIB ([Antinori et al., 2022](#); [Nextstrain, 2022](#);  
124 [Vivancos et al., 2022](#)), a line of descent of MPXV that had been circulating in Nigeria, likely  
125 since 1971 ([Faye et al., 2018](#)).

126 The clinical presentation monkeypox caused by clade I or IIA includes fever,  
127 headache, lymphadenopathy, and/or malaise, followed by a characteristic rash that progresses  
128 centrifugally from maculopapules via vesicles and pustules to crusts that may occur on the  
129 face, body, mucous membranes, palms of the hands, and soles of the feet (Ježek et al., 1987).  
130 The clinical presentation of the current MPXV subclade IIB infections diverges from classical  
131 monkeypox by having a good prognosis, self-limiting but infectious skin lesions (typically  
132 emerging at and restricted to the genital, perineal/perianal, and/or peri-oral areas) before the  
133 development of fever, lymphadenopathy, and malaise. Generalized disease usually manifests  
134 with a rash that has not been widely observed in the current outbreak. Human-to-human  
135 transmission is substantially higher in subclade IIB MPXV-associated outbreaks than in clade  
136 I and clade IIA MPXV ([Bunge et al., 2022](#); [Otu et al., 2022](#); [Thornhill et al., 2022](#); [Ulaeto et](#)  
137 [al., 2022](#); [Vusirikala et al., 2022](#)). The  $R_0$  for MPXV IIB among men who have sex with men  
138 (MSM) is higher than 1. Transmission may be catalyzed by decreasing protection associated  
139 with the VARV/smallpox vaccination campaign that ended in 1980 ([Grant et al., 2020](#);  
140 [Rimoin et al., 2010](#)). Furthermore, a change in transmission route may be the cause of the  
141 difference in clinical presentation and pathogenesis as was shown in animal models  
142 ([Reynolds et al., 2006](#)).

143 Orthopoxvirus infections are classified as systemic or localized illnesses. Localized  
144 usually means that signs are restricted to the site of MPXV entry, as described in the 2022  
145 outbreak. The involved orthopoxvirus, its route of entry, and the immune status of the host  
146 are usually the only determinants of generalized or localized infection. Different mechanisms

147 of virion entry and egress, as well as virus-encoded host factors, are the main biological  
148 determinants ([Liu et al., 2019](#); [McFadden, 2005](#); [Moss, 2006](#); [2016](#); [Roberts and Smith,](#)  
149 [2008](#)). Changes in the genome of the current MPXV variant, such as gene loss ([Kugelman et](#)  
150 [al., 2014](#)), may explain both trends.

151         The MPXV genome is a linear,  $\approx$ 197-kb-long double-stranded DNA with covalently  
152 closed hairpin ends. The genome's densely packed orthologous poxvirus genes (OPGs)  
153 ([Senkevich et al., 2021](#)) are distributed over a central conserved region (“core”) and flanking  
154 terminal regions, each of which ends in identical but oppositely oriented  $\approx$ 6.4-kb-long  
155 terminal inverted repetitions (ITRs). Roughly 193 open reading frames (ORFs) encode  
156 proteins with  $\geq$ 60 amino-acid residues. “Housekeeping” proteins involved in MPXV  
157 transcription, replication, and virion assembly are encoded by OPGs located in the central  
158 conserved region, whereas proteins involved in host range and pathogenesis are mostly  
159 encoded by OPGs located in the terminal regions. Like all orthopoxvirus genomes, the  
160 MPXV genome contains numerous tandem repeats in the ITRs as well as nucleotide  
161 homopolymers all over the genome ([Moss and Smith, 2021](#); [Shchelkunov et al., 2002](#); [Wittek](#)  
162 [and Moss, 1980](#)). However, we also observed other similar structures through the MPXV  
163 genome in the form of short tandem repeats (STRs). Moreover, initial observations appear to  
164 indicate that these STRs (which may consist of dinucleotide, trinucleotide, or more complex  
165 palindromic repeats) are localized in areas where more variation is observed suggesting a  
166 crucial role in the MXPV biology and evolution.

167         Orthopoxviruses rapidly acquire higher fitness by massive gene amplification  
168 (genome expansion) when encountering severe bottlenecks *in vitro*. This amplification, akin  
169 to gene reduplication in organismal evolution, enables gene copies to accumulate mutations,  
170 potentially resulting in new protein variants that can overcome the bottlenecks. Subsequent  
171 gene copy reduction (genome contraction) offsets the costs associated with increasing



172 genome length, thereby retaining the adaptive mutations ([Elde et al., 2012](#)). Orthopoxviruses  
173 also rapidly adapt to selective pressures by single-nucleotide insertions (genome expansion)  
174 or deletions (genome contractions) within poly-A or poly-T stretches, resulting in easily  
175 reversible gene-inactivating or re-activating frameshifts ([Senkevich et al., 2020](#)). These  
176 rhythmic genome expansions and contractions are referred to as “genomic accordions” at the  
177 gene and base level ([Elde et al., 2012](#)). Given the overall conservation of STRs in  
178 orthopoxvirus genomes, we hypothesized that their variation could be a third type of genomic  
179 accordion and that, overall, this type of adaptation (which we designate here as low-  
180 complexity regions [LCRs]), rather than single-nucleotide polymorphisms (SNPs), could be  
181 the key to understanding the unusual epidemiology of 2022 subclade IIb MPXV.

182

## 183 **RESULTS**

### 184 ***De novo* assembly of subclade II lineage B.1 monkeypox virus (MPXV) genome** 185 **sequence 353R**

186 Using a template-based mapping approach, shotgun metagenomic short-read-based  
187 sequencing of nucleic acids in vesicular lesion swabs from Spanish monkeypox patients  
188 resulted in the determination of 48 MPXV consensus genome sequences with at least 10X  
189 read depth. A median of 39,697,742 high-quality reads per swab (maximum = 111,030,976;  
190 minimum = 7,780,032) were obtained using a NovaSeq 6000 Illumina sequencer. Although  
191 98.12% of the reads were assigned as being of human origin, a median of 74,085 MPXV  
192 reads (maximum = 27,516,891; minimum = 30,854) sufficed to cover >99% of the genome  
193 (**Table S1**).

194 Read mapping indicated that, as expected, LCRs of the MPXV genome were mostly  
195 unresolved. More importantly, those results were biased by the MPXV genome sequence  
196 used for mapping (subclade II lineage A MPXV isolate MPXV-M5312\_HM12\_Rivers):

197 LCRs were resolved by the used reference-mapping software tools “following” the sequence  
198 provided in the reference genome instead of reporting the actual sequence (**Figure S1A**). To  
199 determine the actual LCR sequence, we explored different assembly strategies generally used  
200 for resolving eukaryotic genomes, which mostly combine different sequencing technologies.  
201 To increase the chances of success, we applied these technologies to a monkeypox patient  
202 sample with a high proportion of high-quality viral reads (swab 353R). The *de novo* assembly  
203 obtained from NovaSeq (2x150-bp pair-ended reads), MiSeq (2x300-bp pair-ended reads),  
204 and Nanopore sequencing generated 3, 2, and 1 contigs belonging to MPXV, covering 97%,  
205 97%, and 101% of the MPXV-M5312\_HM12\_Rivers sequence, respectively (**Figure 1**).

206

### 207 **Characterization and validation of non-randomly distributed low-complexity regions** 208 **(LCRs) in monkeypox virus (MPXV) genome sequence 353R**

209 We applied a systematic approach for LCR discovery to the MPXV 353R sequence that  
210 resulted in the identification of 21 LCRs (13 STRs, 8 homopolymers; **Tables 1** and **S2**). Two  
211 pairs of LCRs (1/4 and 10/11) are located in the ITRs and are identical copies in reverse-  
212 complementary form. Consequently, we moved forward with 19 LCRs.

213 In general, LCRs were resolved using the assembly obtained from single-molecule  
214 sequencing and further validated using short-read sequencing since most sequences were 13–  
215 67 bp long and therefore were covered by reads from each side or flanking region without  
216 mismatches (**Figure S1B**; **File S1**). All LCRs (except pair 1/4 and 3) were validated this way.  
217 LCR pair 1/4 (256 bp) and LCR3 (468 bp) were only resolved with single-molecule  
218 sequencing reads due to their lengths (**Table 2**).

219 LCR3 contains a complex tandem repeat with the sequence ATAT [ACATTATAT]<sub>n</sub>.  
220 Our analysis indicated n=52. No publicly available MPXV genome sequence contains a  
221 tandem repeat of similar length. However, applying the analysis to 35 publicly available

222 MPXV National Center for Biotechnology Information (NCBI) Sequence Read Archive  
223 (SRA) datasets of single-molecule raw reads allowed us to resolve the LCR3 of some (**Figure**  
224 **2A**). Fifteen datasets revealed supporting long reads that include both LCR3 flanking regions.  
225 Interestingly, four subclade IIb lineage B.1 MPXV sequences associated with the 2022  
226 monkeypox epidemic and available in SRA have n=54–62 repeats in LCR3. Their number of  
227 repeats separate these sequences from 2018–2019 subclade IIb lineage A sequences that have  
228 n=12–42 repeats in LCR3, indicating LCR3 as a region of genomic instability and high  
229 variability.

230 LCR pair 1/4 contains a tandem repeat with the sequence  
231 [AACTAACTTATGACTT]<sub>n</sub>. Our analysis indicated n=16. Instead, the sequences of the  
232 subclade IIb lineage B.1 MPXV isolate MPXV\_USA\_2022\_MA001 and lineage A reference  
233 isolate MPXV-M5312\_HM12\_Rivers LCR pair 1/4 have n=8 (**Table 3**). Inclusion of the  
234 NCBI SRA datasets into the analysis confirmed the n=16 value (**Figure 2B**). In addition, the  
235 analysis revealed subclade IIb lineage-specific repeat differences in LCR pair 1/4. Lineage  
236 A.1 viruses are polymorphic, having 14 repeats (n=1 sequences), 16 (n=3), 17 (n=7), and 19  
237 (n=1); lineage A.2 viruses have n=23–26 repeats; lineage A viruses have n=32, 43, 53, or 71  
238 repeats. In contrast, lineage B1 viruses consistently have n=16. While LCR3 appears to have  
239 “increased” in length since the spillover, LCR pair 1/4 appears to be decreasing in length,  
240 thus behaving like an “accordion” over time.

241 The subclade II lineage B.1 353R and MPXV\_USA\_2022\_MA001 genome sequences  
242 have the same 67 SNPs called against the subclade II lineage A reference isolate MPXV-  
243 M5312\_HM12\_Rivers genome sequence. Additionally, the 353R sequence has two  
244 additional paired SNPs in the left and right ITRs (5,595G→A; 191,615C→T compared with  
245 the MPXV-M5312\_HM12\_Rivers sequence) that result in the introduction of a stop codon in  
246 OPG015. We observed this variation in only two other patients among our sample set. The

247 353R and MPXV\_USA\_2022\_MA001 sequences also differ by two number of insertion (ins)  
248 or deletion (del) of bases (indels) at positions 133,077 and 173,273, respectively, which  
249 correspond to differences in LCR2 and LCR5, respectively. As a result of the resolution  
250 LCRs, sequence 353R differs by 1,342 bp in genome length compared with the  
251 MPXV\_USA\_2022\_MA001 sequence and 1,338 bp compared with the MPXV-  
252 M5312\_HM12\_Rivers sequence. Most of the variation is due to differences in the length of  
253 LCR pair 1/4 and LCR3, along with minor length differences in LCR2, LCR5, and LCR pair  
254 10/11 (**Table 3**). In general, the number of repeats (n) found with the hybrid assembly  
255 approach we used here doubled the length of LCRs.

256         Based on the higher resolution of the MPXV 353R genome sequence, in particular  
257 regarding LCRs, we propose this sequence as the new MPXV high-quality genome (HQG)  
258 reference sequence according to the sequence quality standards defined in ([Ladner et al.,](#)  
259 [2014](#)).

260

### 261 **Low-complexity regions (LCRs) are non-randomly distributed in the monkeypox virus** 262 **(MPXV) genome**

263 We compared the distribution of LCRs between the different major functional protein OPG  
264 groups following the classification of ([Senkevich et al., 2021](#)). Differences between  
265 functional groups were statistically significant (Kruskal–Wallis test,  $\chi^2$   $p$ -value <0.001).  
266 Pairwise analysis demonstrated that the functional group “core” (orthopoxvirus genomic  
267 central conserved region) includes LCRs at a significantly lower frequency (multiple  
268 pairwise-comparison Wilcoxon test) than functional groups “ANK/PRANC” (false discovery  
269 rate [FDR]-corrected  $p$ -value <0.0001), “Bcl-2 domain” (corrected  $p$ -value = 0.04), and  
270 “accessory” (FDR-corrected  $p$ -value <0.0001) (**Figure 3A**). These analyses indicate that

271 LCRs in orthopoxvirus genomes are non-randomly distributed and that there is a significant  
272 purifying selection force against introducing LCRs in central conserved region areas.

273         Next, we compared the degree of diversity among the 21 identified LCRs with the  
274 observed SNP variability that had been the focus of the field. In the 353R HQG sequence,  
275 LCRs 2, 5, 7, 10, 11, and 21 had intra-host genetic diversity, with entropy values that ranged  
276 from 0.18 (LCR7) to 1.66 (LCR2), with an average of 0.81 and a standard deviation (SD) of  
277 0.64 among them (**Table 2**). Only five nucleotide positions (1,285; 6,412; 88,807; 133,894;  
278 and 145,431) had intra-host genetic diversity at the SNP level. The entropy values ranged  
279 from 0.17 (position 133,894) to 0.69 (position 6,412), with an average of 0.38 and a SD=0.21  
280 among them. Interestingly, a student's t-test revealed a significantly higher level of diversity  
281 in LCRs than in SNPs ( $p$ -value = 0.021; **Figure 3B**).

282         Then, we characterized, collected, and compared the allele frequencies for all LCRs  
283 from all dataset samples (**Table S3**) applying the filters described above. Our analyses  
284 revealed that the average inter-sample Euclidean distances at LCRs ranged from 0.05  
285 (LCR21) to 0.73 (LCR2) (**Figure 3C**). We found statistically significant differences between  
286 LCRs (Kruskal–Wallis  $\chi^2$   $p$ -value < 0.001). More specifically, multiple pairwise comparison  
287 Wilcoxon test results showed that all LCRs have significantly different levels of inter-sample  
288 distances (FDR-corrected  $p$ -values < 0.001), except in case of the LCR10 versus LCR11  
289 (FDR-corrected  $p$ -value = 0.48) and LCR2 versus LCR5 (FDR-corrected  $p$ -value = 0.25)  
290 (**Figure 3C**). Average distances in SNPs were 0.0018–0.4168. Our randomization tests  
291 revealed that all LCRs have a significantly higher level of inter-sample diversity than the  
292 SNPs (all FDR-corrected  $p$ -values < 0.05) (**Figure 3C**). These analyses uncovered that most  
293 of the variability in the orthopoxvirus genome is located in LCR. Consequently, we posit that  
294 studies focusing on phenotypic MPXV (and likely other orthopoxvirus) clade-/subclade-

295 /lineage-/strain differences due to genomic sequence variation should change their focus to  
296 the study of LCR variability instead of SNP variability.

297

298 **Low-complexity regions (LCRs) might be more phylogenetically informative than**  
299 **single-nucleotide polymorphisms (SNPs) for inter-host sequence analysis**

300 Analysis of only two monkeypox patient samples (353R and 349R) resulted in sufficient  
301 sequence coverage information to enable allele frequency comparison in most LCRs (**Figure**  
302 **4A**). Their side-by-side comparison revealed differences in allele frequency in some of them  
303 (LCR2, LCR5, and LCR pair 10/11) (**Figure 4B**). The sequence coverage achieved with the  
304 remaining samples only enabled to unequivocally resolve an LCR subset (i.e., covering both  
305 flanking regions: LCRs 2, 5, 7, 8, 9, and pair 10/11). LCR8 and LCR9 were identical across  
306 the entire sample set. However, LCR7 and LCR pair 10/11 had considerable intra-host  
307 variation, as well as differences in the preponderant allele (LCR pair 10/11) between samples  
308 (**Figure 4C**).

309 Phylogenetic (**Figure S2A**) and haplotype network (**Figure S2B**) analyses of the  
310 sequences determined from the monkeypox patient samples yielded limited information  
311 regarding the outbreak. Most sequences were highly similar and are, therefore, part of the  
312 basal ancestral MPXV subclade IIb lineage B1 node. Some sequences formed supported  
313 clusters: Sequences clustered into groups (**Table S4**):

- 314
- 315 • group 1 (lineage B.1): sequences from patients 395, 399, and 441 and Floridian  
316 MPXV isolate MPXV\_USA\_2022\_FL002 (GenBank #ON676704);
  - 317 • group 2 (lineage B.1): sequences from patients 347, 352R, 353R, 416, and Spanish  
318 MPXV isolate MPXV/ES0001/HUGTiP/2022 (GenBank #ON622718); all share a  
stop-codon mutation in OPG015;

- 319       • group 3 (lineage B.1.3): sequences from patients 22,369 formed with Slovenian  
320       MPXV isolate SLO (GenBank #ON609725.2), French isolate  
321       MPXV\_FR\_HCL0001\_2022 (GenBank #ON622722), and 38 other sequences  
322       worldwide; defined by NBT03\_gp174 mutation G190,660A, resulting in an R84K  
323       amino-acid residue change;
- 324       • group 4 (lineage B.1): sequences from patients 417 and 2,437;
- 325       • group 5 (lineage B.1.1): sequences from patients 698; 1,300; 2,388; 2,428; German  
326       MPXV isolate MPXV/Germany/2022/RKI01 (GenBank #ON637938.1) and 97 other  
327       sequences worldwide; defined by OPG094 mutation G74,360A resulting in a R194H  
328       amino-acid residue change); and
- 329       • group 6 (lineage B.1): sequences from patients 2,309 and 2,317.

330       Only one epidemiological link among group samples was identified; patients 395 and  
331       399 came from sexual partners who attended events in Portugal and Spain.

332       In summary, at least at this time in the monkeypox epidemic, there appears to be  
333       limited value in full-genome SNP characterization for transmission analysis.

334

335       **Conservation and variation in proteins encoded by orthologous poxvirus gene (OPG)**  
336       **and codon usage analysis in OPG low-complexity regions (LCRs)**

337       Analyses showed that LCRs were associated with intra-host and inter-sample variation.

338       Although most LCRs that showed variability in our sample set (pair 1/4, 2, 3, 5, 7, pair 10/11,

339       and 21), three (3, 7, and 21) are located in regions that, considering orthopoxvirus

340       evolutionary history, are associated with virulence or transmission ([Chen et al., 2005](#);

341       [Kastenmayer et al., 2014](#)). Noteworthy, three of the 21 highly repetitive areas identified in

342       our intra-host variation analysis (those of LCRs 5, 6, and 7) are located in a defined central

343       conserved region of the orthopoxvirus genome between positions 130,000 and 138,000

344 **(Figure 1)**. This region contains OPG152 (which is truncated in the MPXV genome),  
345 OPG153 (directly affected by LCR7), and OPG154. LCR7 is the only STR that is located at  
346 the center of a functional ORF). In contrast, LCR3 and LCR21 are situated in the  
347 promoter/start area, potentially modifying the ORF start site. The repeat area of LCR7  
348 encodes a poly-D homopolymer in a nonstructured region of OPG153 **(Figure 5A)**. The  
349 changes we uncovered result in the insertion of two isoleucyls. This change resembles the  
350 primary structure found in clade I viruses. In contrast, pre-2017 African subclade IIa viruses  
351 lack such insertions.

352 Another region of potential functional impact is the area between 170,000 to 180,000  
353 that includes LCRs 19, 20, 2, 21 and 3) **(Figure 1)**. The LCR3 repeat [CATTATATA]<sub>n</sub> is  
354 located 21 bp upstream of the putative translation start site of OPG208. Importantly, a  
355 methionyl codon is located immediately upstream of LCR3. The usage of this start codon  
356 would result in the introduction of an Ile-Ile-Tyr repeat. This codon has a medium to low  
357 probability of being used as start codon in the cognate mRNA (T base in position -3),  
358 compared to a “strong” Kozak sequence of the downstream putative start codon.  
359 Nevertheless, LCR3 remained in-frame in all clade II MPXV samples, indicating selective  
360 pressure to maintain the possibility of alternative start translation **(Figure 5B)**. Interestingly,  
361 LCR3 is not located in-frame in most clade I viruses. This may be significant because  
362 OPG208 is a member of a set of genes most likely responsible for increased virulence of  
363 clade I MPXV compared to classical (pre-epidemic) clade IIa MPXV ([Chen \*et al.\*, 2005](#)). The  
364 LCR3 tandem repeat [CATTATATA]<sub>n</sub> is present with n=52, 54, and 62 copies in epidemic  
365 subclade IIb lineage B viruses **(Figure 2A)**, whereas it is n=7, 37, and 27 in subclade IIa  
366 MPXV isolates Sierra Leone (GenBank #AY741551), MPXV-WRAIR7-61 (GenBank  
367 #AY603973), and MPXV-COP-58 (GenBank #AY753185) sequences, respectively ([Chen \*et\*](#)  
368 [al., 2005](#)), as well as n=16 for clade I MPXV isolate Zaire-96-I-16 (GenBank #AF380138).



369 Interestingly, all publicly available subclade II lineage A single-molecule long-read sequence  
370 data imply a repeat  $n < 40$  (**Figure 2A**). Alternatively, the LCR3 repeat sequence could also  
371 alter promoter function. Interestingly, the repeat sequence also introduces codons with a low  
372 usage ratio that are not be optimized for expression in primates. The codon triplet ATA,  
373 which encodes isoleucyl, has a rare codon usage of 0.17 ([Stothard, 2000](#)) (**Figure 5B**).

374 Similarly, the STR downstream of LCR21 introduces a methionyl codon upstream of  
375 the putative start codon for OPG204 (**Figure 5C**). Kozak sequence analysis revealed a  
376 medium to high probability for translation compared with the putative start codon (**Figure**  
377 **5C**).

378 The remaining LCRs (2, pair 4/1, and pair 10/11) are located downstream of known  
379 ORFs; thus, their variation is less likely to be associated with a change in phenotype.

## 380 **DISCUSSION**

381 MPXV subclade IIB traces back to a human MPXV infection that likely occurred after  
382 spillover from a local animal reservoir in Ihie, Abia State, Nigeria, in 1971. An additional 10  
383 human infections with MPXV of this lineage were detected through 1978, when this lineage  
384 seemed to have disappeared. However, in 2017, it reemerged in Yenagoa, Bayelsa State,  
385 Nigeria ([Faye et al., 2018](#)). Since then, hundreds of monkeypox cases have been reported and  
386 MPXV belonging to the IIB lineage has been sampled in several countries. But, there were no  
387 secondary cases prior to the 2022 epidemic ([Cohen-Gihon et al., 2020](#); [Ng et al., 2019](#);  
388 [Vaughan et al., 2018](#); [Yong et al., 2020](#)).

389 Subclade IIB viruses cause monkeypox that presents differently than the classical  
390 disease caused by clade I and subclade IIA viruses, i.e., subclade IIB infections are associated  
391 with higher prevalence among adults rather than adolescents, are predominant in the MSM  
392 community, and are efficiently transmitted human-to-human from localized infectious skin  
393 lesions rather than requiring disseminated infection ([Bunge et al., 2022](#); [Otu et al., 2022](#);  
394 [Thornhill et al., 2022](#); [Ulaeto et al., 2022](#); [Vusirikala et al., 2022](#)).

395 Comparative genomics demonstrated obvious relationships between orthopoxvirus  
396 genotype and phenotype, driven by selective pressure from hosts ([Baroudy and Moss, 1982](#);  
397 [Chen et al., 2005](#); [Esposito et al., 2006](#); [Gubser et al., 2004](#); [Hendrickson et al., 2010](#);  
398 [Kugelman et al., 2014](#); [Shchelkunov, 2012](#); [Shchelkunov et al., 2001](#)). Consequently, it was  
399 expected that increased MPXV genotype IIB human-to-human transmission would go hand in  
400 hand with genotypic changes. However, since orthopoxviruses genomes are organized in  
401 redundant ways ([Bratke and McLysaght, 2008](#); [Elde et al., 2012](#); [McLysaght et al., 2003](#);  
402 [Senkevich et al., 2020](#)), genotypic changes were expected to be modulating, rather than  
403 radical.

404 Thus far, genomic characterization of the 2022 epidemic has focused on describing its  
405 evolutionary history and tracking MPXV introductions into western countries. The 2022  
406 MPXV cluster diverges from its predecessor viruses by an average of 50 SNPs. Of these, the  
407 majority (n=24) are non-synonymous mutations with a second minority subset of  
408 synonymous mutations (n=18) and a few intergenic differences (n=4) ([Isidro et al., 2022](#)). A  
409 strong mutational bias was mainly attributed to the potential action of apolipoprotein B  
410 mRNA-editing catalytic polypeptide-like 3 (APOBEC3) enzymes ([O'Tool and Rambaut,  
411 2022](#)). Genetic variation, including deletion of immunomodulatory genes, also occurred  
412 ([Jones et al., 2022](#)). MPXV sublineages mostly represent very small variations, usually  
413 characterized by one or two SNP differences to basal nodes in phylogenetic analyses  
414 ([Nextstrain, 2022](#)). Four of the MPXV genome sequences determined in this study can be  
415 assigned to global lineage B.1.1, one sequence could be assigned to global lineage B.1.3, and  
416 the remaining new sequences belong to lineage B1. We detected additional clusters that were  
417 also defined by few SNPs, but only in one case could we identify an epidemiological link.  
418 Thus, there appears to be a limited relationship between SNPs and epidemiology, which  
419 might hint to sequencing errors. Consequently, MPXV genomic epidemiology might need a  
420 change of focus.

421 Our analyses located considerable MPXV genomic variability in areas previously  
422 considered of poor informative value, i.e., in LCRs. Because LCR entropy is significantly  
423 higher than that of SNPs and LCRs are not randomly distributed in defined coding areas in  
424 the genome, person-to-person transmission-associated changes were observed in the  
425 immunomodulatory region ([Kugelman et al., 2014](#)), and genomic accordions are a rapid path  
426 for adaptation of orthopoxvirus during serial passaging ([Elde et al., 2012](#); [Senkevich et al.,  
427 2020](#)), we posit that LCR changes might be associated with MPXV transmissibility  
428 differences over time.

429           Eight LCRs had evident signs of intra-host and inter-sample variation (pair 1/4, 2, 3,  
430 5, 6, 7, pair 10/11, 21). Five of them (5, 6, 7, 3, and 21) were co-located in two areas of the  
431 MPXV genome: base pairs 130,000–135,000 (5, 6, and 7) which are in the central conserved  
432 region of the OPXV genome in which most “housekeeping” genes are located; and base pairs  
433 170,000–180,000 (3 and 21), which are located in the immunomodulatory area (**Figure 1**).  
434 Three of those LCRs are located inside the putative translated regions of genes OPG153,  
435 OPG204, and OPG208. Changes in OPG204 and OPG208 are located near the N-terminal  
436 region and might involve modulating the expression of translation. The changes observed in  
437 OPG153 stand out as they are located inside a region that is under high selective pressure for  
438 transmission in a “housekeeping” orthologous poxvirus gene, which is involved in virion  
439 attachment and egress ([Senkevich \*et al.\*, 2021](#)). Thus, we urge that these areas be scrutinized  
440 for changes that might affect the MPXV interactome.

441           The OPG153 repeat results in a poly-Asp amino-acid homopolymer string (**Figure**  
442 **5A**); the LCR repeat in OPG208 results in an Ile-Ile-Tyr repeat (**Figure 5B**); and the N-  
443 terminal domain variation in OPG204 results in a Met-Lys repeat (**Figure 5C**). Self-  
444 association guided by stretches of single amino-acid residue repeats may lead to the  
445 formation of aggregates ([Oma \*et al.\*, 2004](#)). Many human diseases are associated with  
446 detrimental effects of homopolymers ([Gatchel and Zoghbi, 2005](#); [Shoubridge \*et al.\*, 2007](#)).  
447 Expansion or contraction of the repeat may increase self-attraction and trigger disease. These  
448 homopolymers also regulate the activity of transcription factors ([Gemayel \*et al.\*, 2015](#)) or  
449 direct proteins to different cellular compartments ([Oma \*et al.\*, 2004](#); [Salichs \*et al.\*, 2009](#)).  
450 Modulation of ORF translation via MPXV LCR-like repeats also has been described for  
451 various microbes. For instance, the functionality of baker’s yeast proteins Flo1p and Flo11p  
452 is proportionally modulated by the repeat length of their N-terminal regions. A relatively  
453 small change in the number of tandem repeats is crucial for yeast adaptation to a new

454 environment ([Fidalgo et al., 2006](#); [Verstrepen et al., 2005](#)). Another example is glutamic  
455 acid-rich protein (GARP) of plasmodia, which contains repetitive sequences that direct the  
456 protein to the periphery of the infected erythrocyte. At least nine other exported plasmodium  
457 proteins target the periphery of the erythrocyte using this strategy. Interestingly, the lengths  
458 of the tandem repeats vary among plasmodium strains ([Davies et al., 2017](#); [Davies et al.,](#)  
459 [2016](#)).

460 Protein translation rates are in part regulated by the availability of mRNA codon-  
461 cognate aminoacylated tRNAs. Homopolymers composed of codons for rare tRNAs directly  
462 diminish translation via tRNA depletion. The non-optimal tyrosyl codons in MPXV LCRs 3  
463 and 21 suggest such translation modulation for OPG208 and OPG204, respectively. The  
464 protein encoded by OPG208, B19R (Cop-K2L, SPI-1) is a serine protease inhibitor-like  
465 protein that functions as an inhibitor of apoptosis in VACV-infected cells ([Kettle et al., 1995](#);  
466 [Kotwal and Moss, 1989](#)), which could prevent VACV proliferation and protect nearby cells  
467 ([Brooks et al., 1995](#); [Jorgensen et al., 2017](#)). Consequently, MPXV B19R is now considered a  
468 potential MPXV virulence marker ([Chen et al., 2005](#)). The protein encoded by OPG204,  
469 B16R, is a secreted decoy receptor for interferon type I ([Colamonici et al., 1995](#); [Hernández et](#)  
470 [al., 2018](#)). We did not observe any repeat number changes OPG204-associated LCR21, but  
471 SNPs in clade I, subclade IIa, and subclade IIb result in alternative translational start sites  
472 followed by a, suggesting these SNPs could have direct effects on OPG204 translation.

473 The most intriguing finding from our dataset involves LCR7 in OPG153. The  
474 OPG153 expression product (A26L) attaches orthopoxvirus particles to laminin ([Chiu et al.,](#)  
475 [2007](#)) and regulates orthopoxvirus particle egress ([Howard et al., 2008](#); [Kastenmayer et al.,](#)  
476 [2014](#); [Liu et al., 2014](#); [Ulaeto et al., 1996](#)), thereby modulating key steps in the virus  
477 lifecycle. OPG153 is unique as it is the central conserved region gene that has been “lost” the  
478 most times during orthopoxvirus evolution ([Senkevich et al., 2021](#)). Inactivation of OPG153

479 genes by frameshift mutations occurs rapidly in experimental orthopoxvirus evolution models  
480 ([Senkevich et al., 2020](#)), resulting increased virus replication levels, changes in particle  
481 morphogenesis, decreased particle-to-PFU ratios, and differences in pathogenesis  
482 ([Kastenmayer et al., 2014](#); [Senkevich et al., 2020](#)). Finally, A26L is the main target of the  
483 host antibody response to orthopoxvirus infection ([Keasey et al., 2010](#); [Pugh et al., 2016](#)).  
484 Thus, any genomic change that modulates OPG153 is likely of significance. LCR7 encodes a  
485 poly-D non-structured region that is conserved among orthopoxviruses A26Ls; however, its  
486 length is highly variable. In mammals, poly-D stretches appear to provide functionality to  
487 asporin, a small leucin rich repeat proteoglycan that also possesses a unique stretch of  
488 aspartyls at its N terminus ([Henry et al., 2001](#)), associated with calcium-binding ([Zhu et al.,](#)  
489 [2018](#)). Interestingly, orthopoxviruses that form a dense protein matrix within the cytoplasm  
490 called A-type inclusions (ATIs), such as MPXV, generically have very long poly-D stretches  
491 in this region, whereas orthopoxviruses that do not form ATIs, such as VACV and VARV,  
492 have reduced their LCR7 poly-D stretches to four Ds. Even among MPXV clades, patterns  
493 are observable. Subclade IIa viruses have an extended 21 amino-acid residue poly-D stretch,  
494 whereas clade I and subclade IIb viruses have poly-D stretches with two inserted isoleucyls.  
495 Intriguingly, both insertions result from the incorporation of the same “ATCATA” nucleotide  
496 insertion in the “GAT” repetitive stretch.

497         In summary, our findings expand the concept of genome accordions as a simple and  
498 recurrent mechanism of adaptation on a genomic scale in orthopoxvirus evolution. A  
499 consequence of this broadening is the recognition that MPXV genome LCRs might hold the  
500 key to improved understanding of current monkeypox epidemiology and clinical  
501 presentation. A new standardized approach to generate and analyze sequencing data via  
502 prioritizing LCR characterization and subsequent functional mechanism-of-action studies are  
503 warranted.

## 504 **MATERIALS AND METHODS**

### 505 **Study population**

506 This study includes confirmed human monkeypox cases diagnosed from May 18 to July 14,  
507 2022, at the Centro Nacional de Microbiología (CNM), Instituto de Salud Carlos III, Madrid,  
508 Spain. The study was performed as part of the public health response to the current  
509 monkeypox epidemic by the Spanish Ministry of Health. Sample information is listed in  
510 **Tables S1 and S5.**

511 The samples used in this work were obtained in the context of the Microbiological  
512 Surveillance and Diagnosis Program for the Monkeypox Outbreak of the Centro Nacional de  
513 Microbiología, Instituto de Salud Carlos III. The study was based on routine testing, did not  
514 involve any additional sampling or tests and stored RNA extracts were used, so specific  
515 ethical approval was not required for this study. All sequenced viruses corresponded to those  
516 to patients that gave consent to be analyzed for diagnosis or surveillance purposes.

517

### 518 **Study sample processing**

519 Swabs of vesicular lesions from study patients in viral transport media were sent refrigerated  
520 to CNM. Nucleic acids were extracted at CNM using either QIAamp MinElute Virus Spin  
521 (DNA) or QIAamp Viral RNA Mini kits (Qiagen, Germantown, MD, USA) according to the  
522 manufacturer's recommendations. Inactivation of samples was conducted in a certified class  
523 II biological safety cabinet in a biosafety level (BSL) 2 laboratory using BSL-3 best practices  
524 with appropriate personal protective equipment.

525

### 526 **Monkeypox virus (MPXV) laboratory confirmation**

527 MPXV detection by PCR in a sample was considered laboratory confirmation and resulted in  
528 inclusion of the swab in the study. A previously described orthopoxvirus-generic real-time

529 PCR (qPCR) was used for screening ([Fedele et al., 2006](#)). A previously described  
530 conventional validated nested PCR targeting OPG002 (encoding a TFN receptor) was used  
531 for results confirmation ([Sánchez-Seco et al., 2006](#)).

532

### 533 **MPXV genome sequencing**

534 Sequencing libraries were prepared with a tagmentation-based Illumina DNA Prep kit  
535 (Illumina, San Diego, CA, USA) and run in a NovaSeq 6000 SP Reagent Kit (Illumina) flow  
536 cell using 2x150 paired-end sequencing. To improve assembly quality, the library from swab  
537 353R, an unpassaged vesicular fluid from a confirmed case, was also run in a MiSeq Reagent  
538 Kit v3 (Illumina) flow cell using 2 x 300 paired-end sequencing. Additionally, sample 353R  
539 was also analyzed by single-molecule methods using Nanopore sequencing (Oxford  
540 Nanopore Technologies, Oxford, UK). For Nanopore sequencing, 210 ng of DNA was  
541 extracted from swab 353R and used to prepare a sequence library with a Rapid Sequencing  
542 Kit (Oxford Nanopore Technologies); the library was analyzed in an FLO-MIN106D (Oxford  
543 Nanopore Technologies) flow cell for 25 h. The process rendered 1.12 Gb of filter-passed  
544 bases.

545

### 546 **Bioinformatics**

#### 547 ***De novo* assembly and annotation of subclade II lineage B.1 MPXV genome sequence**

548 **353R.** Due to the high yield of MPXV genomic material in a preparatory run, swab 353R was  
549 selected as source material for the determination of an MPXV high-quality genome (HQG)  
550 sequence. Single-molecule long-sequencing reads were preprocessed using Porechop  
551 v0.3.2pre ([Wick et al., 2017](#)) with default parameters. Reads were *de novo* assembled using  
552 Flye v2.9-b1768 ([Kolmogorov et al., 2019](#)) in single-molecule sequencing raw read mode  
553 with default parameters, resulting in one MPXV contig of 198,254 bp. Short 2x150



554 sequencing reads were mapped with Bowtie2 v2.4.4 ([Langmead and Salzberg, 2012](#)) against  
555 the selected contig, and resulting BAM files were used to correct the assembly using Pilon  
556 v1.24 ([Walker et al., 2014](#)). At this intermediate step, this corrected sequence was used as a  
557 reference in the nf-core/viralrecon v2.4.1 pipeline ([Patel et al., 2022](#)) for mapping and  
558 consensus generation with short sequencing reads. The allele frequency threshold of 0.5 was  
559 used for including variant positions in the corrected contig.

560         Short MiSeq 2x300 and NovaSeq 2x150 sequencing reads were also assembled *de*  
561 *novo* using the nf-core/viralrecon v2.4.1 pipeline, written in Nextflow ([Di Tommaso et al.,](#)  
562 [2017](#)) in collaboration between the nf-core community ([Ewels et al., 2020](#)) and the Unidad de  
563 Bioinformática, Instituto de Salud Carlos III, Madrid, Spain (<https://github.com/BU-ISCI>).  
564 FASTQ files containing raw reads were quality controlled using FASTQC v0.11.9 ([Andrews,](#)  
565 [2010](#)). Raw reads were trimmed using fastp v0.23.2 ([Chen et al., 2018](#)). The sliding-window  
566 quality-filtering approach was performed, scanning the read with a 4-base-wide sliding  
567 window and cutting 3' and 5' base ends when average quality per base dropped below a  
568 Qphred33 of 20. Reads shorter than 50 bp and reads with more than 10% read quality under  
569 Qphred 20 were removed. Host genome reads were removed via kmer-based mapping of the  
570 trimmed reads against the human genome reference sequence GRCh38  
571 ([https://www.ncbi.nlm.nih.gov/data-hub/genome/GCF\\_000001405.26/](https://www.ncbi.nlm.nih.gov/data-hub/genome/GCF_000001405.26/)) using Kraken 2  
572 v2.1.2 ([Wood et al., 2019](#)). The remaining non-host reads were assembled using SPADES  
573 v3.15.3 ([Antipov et al., 2016](#); [Prjibelski et al., 2020](#)) in maviral mode. A fully ordered MPXV  
574 genome sequence was generated using ABACAS v1.3.1 ([Assefa et al., 2009](#)), based on the  
575 MPXV isolate MPXV\_USA\_2022\_MA001 (Nextstrain subclade I1b lineage B.1) sequence  
576 (GenBank #ON563414.3) ([Gigante et al., 2022](#)). The independently obtained *de novo*  
577 assemblies and reference-based consensus genomes obtained from swab 353R were aligned

578 using MAFFT v7.475 ([Katoh et al., 2019](#)) and visually inspected for variation using Jalview  
579 v2.11.0 ([Waterhouse et al., 2009](#)).

580 ***Systematic identification of low-complexity regions in orthopoxvirus genomes.*** Detection of  
581 short tandem repeats (STRs) in the HQG sequence and other orthopoxvirus genomes was  
582 performed with Tandem repeats finder ([Benson, 1999](#)), using default parameters. Briefly, the  
583 algorithm works without the need to specify either the pattern or its length. Tandem repeats  
584 are identified considering percent identity and frequency of insertion (ins) or deletion (del) of  
585 bases (indels) between adjacent pattern copies, using statistically based recognition criteria.  
586 Since Tandem repeats finder does not detect single-nucleotide repeats, we developed an R  
587 script to systematically identify homopolymers of at least 9 nucleotide residues in all  
588 available orthopoxvirus genome sequences. STRs and homopolymers were annotated as low-  
589 complexity regions (LCRs).

590 ***Curation of low-complexity regions in the MPXV high-quality virus genome sequence.*** We  
591 curated LCRs in the HQG sequence using a modified version of STRsearch ([Wang et al.,  
592 2020](#)). Once provided with identifying flanking regions, STRsearch performed a profile  
593 analysis of STRs in massively parallel sequencing data. To ensure high-quality  
594 characterization of LCR alleles, we modified the script ([https://github.com/BU-  
596 ISCH/MPXstreveal](https://github.com/BU-<br/>595 ISCH/MPXstreveal)) to complement reverse reads that map against the reverse genome  
597 strand according to their BAM flags. In addition, output was modified to add information  
598 later accessed by a custom Python script to select only reads containing both LCR flanking  
599 regions. All LCRs in the HQG sequence were manually validated using STRsearch results  
600 and *de novo* assemblies obtained from all sequencing approaches. When an LCR was only  
601 resolved by single-molecule long-sequencing technologies (LCR pair 1/4 and LCR3), we also  
602 analyzed publicly available data by downloading all single-molecule long-sequencing data  
from the National Center for Biotechnology Information (NCBI) Sequence Read Archive

603 (SRA) (<https://www.ncbi.nlm.nih.gov/sra>) as of August 10, 2022, and analyzed the data  
604 according to **File S1**.

605 ***Final MPXV high-quality virus genome sequence assembly.*** The consensus genome  
606 constructed with the nf-core/viralrecon v2.4.1 pipeline using the corrected *de novo* contig as  
607 stated above, along with the resulting curated and validated consensus LCRs, were used to  
608 build the final HQG reference sequence using a custom Python script. The resulting HQG is  
609 available from the European Nucleotide Archive (#OX044336.2).

610 ***Generation of MPXV high-quality virus genome reference-based consensus sequence for***  
611 ***all other samples.*** For the remaining specimens, sequencing reads were analyzed for MPXV  
612 genome sequence determination using the nf-core/viralrecon v2.4.1 pipeline. Trimmed reads  
613 were mapped with Bowtie2 v2.4.4 against the HQG sequence and the sequence of subclade II  
614 lineage A MPXV isolate M5312\_HM12\_Rivers (GenBank #MT903340.1) ([Mauldin et al.,](#)  
615 [2022](#)). Picard v2.26.10 ([The Broad Institute, 2018](#)) and SAMtools v1.14 ([Li et al., 2009](#)) were  
616 used to generate MPXV genome mapping statistics. iVar v1.3.1 ([Grubaugh et al., 2019](#)),  
617 which calls for low-frequency and high-frequency variants, was used for variant calling.  
618 Variants with an allele frequency higher than 75% were kept to be included in the consensus  
619 genome sequence. BCFtools v1.14 ([Danecek et al., 2021](#)) was used to obtain the MPXV  
620 genome sequence consensus with filtered variants and masked genomic regions with  
621 coverage values lower than 10X. All variants, included or not, in the consensus genome  
622 sequence, were annotated using SnpEff v5.0e ([Cingolani et al., 2012b](#)), and SnpSift v4.3  
623 ([Cingolani et al., 2012a](#)). Final summary reports were created using MultiQC v.1.11 ([Ewels](#)  
624 [et al., 2016](#)). Consensus genome sequences were analyzed with Nextclade v2.4.1  
625 ([Aksamentov et al., 2021](#)) using the “MPXV (All clades)” dataset (timestamp 2022-08-  
626 19T12:00:00Z). Raw reads and consensus genomes are available from the European

627 Nucleotide Archive (#ERS12168855–ERS12168865, #ERS12168867, #ERS12168868,  
628 #ERS13490510–ERS13490543).

629 ***Intra-host and inter-host allele frequency analyses.*** Intra-host genetic entropy (defined as -  
630  $\sum(X_i \cdot \log(X_i))$ , in which  $X_i$  denotes each of the allele frequencies in a position) was  
631 calculated according to the single-nucleotide polymorphisms (SNP) frequencies of each  
632 position along the genome using nf-core/viralrecon v2.4.1 pipeline results. Similarly, genetic  
633 entropy for each LCR was calculated considering the frequencies of repeat lengths.

634 LCR intra-host and inter-host variations in the sample set were analyzed using the  
635 modified version of STRsearch. As a filter for quality for this analysis, STRsearch results  
636 (**Table S5**) were filtered, keeping alleles with at least 10 reads spanning the region and allele  
637 frequency above 0.03. Quality control and allele frequency graphs were created using a  
638 customized R script.

639 Pairwise genetic distances between samples were calculated as Euclidean distances  
640 (defined as  $\sqrt{\sum(x_i - y_i)^2}$ , in which  $x_i$  and  $y_i$  are the allele frequencies of sample  
641 X and Y at a given position, respectively), thus accounting for the major and minor alleles at  
642 each analyzed position. Distances were calculated individually for each variable LCR (STRs  
643 2, 5, 7, 10, 11, and 21) and for each of all 5,422 SNPs showing inter-sample variability  
644 (compared to MPXV-M5312\_HM12\_Rivers). The distributions of inter-sample distances  
645 were compared between LCRs using a Kruskal–Wallis test ( $\chi^2$   $p$ -values) followed by multiple  
646 pairwise-comparison between groups (Wilcoxon test), with  $p$ -values subjected to the false  
647 discovery rate (FDR) correction. A randomization test was used to test whether inter-sample  
648 variability in LCRs is higher than that in SNPs: first, the average Euclidean distance for each  
649 LCR and each SNP position was calculated; then, the average value of each LCR was  
650 compared to a random sample of 1,000 values from the distribution of mean distances from

651 the SNPs along the genome. The  $p$ -value was calculated from the percentage of times that the  
652 mean of the LCR was higher than the randomly taken values from the SNPs.

653 ***Phylogenetic analysis of the MPXV central conserved region.*** Variant calling and SNP  
654 matrix generation was performed using Snippy v4.4.5 ([Seeman, 2015](#)), including sequence  
655 samples and representative MPXV genome sequences downloaded from GenBank (**Table**  
656 **S5**). The SNP matrix with both invariant and variant sites was used for phylogenetic analysis  
657 using IQ-Tree 2 v. 2.1.4-beta ([Minh et al., 2020](#)) via predicted model K3Pu+F+I and 1,000  
658 bootstrap replicates. A phylogenetic tree was visualized and annotated using iTOL v6.5.8  
659 ([Letunic and Bork, 2021](#)). The SNP matrix was also used for generating the haplotype  
660 network using PopArt v1.7 ([Bandelt et al., 1999](#)).

661 ***Selected MPXV ORF analysis.*** Representative orthopoxvirus genomes ([Senkevich et al.,](#)  
662 [2021](#)) were downloaded from GenBank together with the consensus genome sequences from  
663 the specimens analyzed in this study (**Table S5**). MPXV genomes were assigned to clades  
664 and lineages according to the most recent nomenclature recommendations according to  
665 Nextstrain ([Nextstrain, 2022](#)) using Nextclade v2.4.1. Annotations from RefSeq  
666 #NC\_063383.1 (subclade II lineage A MPXV virus isolate MPXV-M5312\_HM12\_Rivers)  
667 GFF file were transferred to all FASTA genome sequences using Liftoff v1.6.3 ([Shumate and](#)  
668 [Salzberg, 2021](#)). OPG153 was extracted using AGAT v0.9.1 ([Dainat et al., 2022](#)) and multi-  
669 FASTA files were generated for each group and gene. OPG204 and OPG208 alternative  
670 annotation start site ORFs were re-annotated in Geneious Prime (Biomatters, San Diego, CA,  
671 USA), and extracted as new alignments. We used MUSCLE v3.8.1551 for aligning each  
672 multi-FASTA file and Jalview v2.11.0 for inspecting and editing the alignments. Finally,  
673 MetaLogo v1.1.2 ([Chen et al., 2022](#)) was used for creating and aligning the sequence logos  
674 for each orthopoxvirus group of the OPG153/LCR7, OPG204/LCR21, and OPG208/LCR3  
675 areas.

676 ***Comparison of LCR frequencies in protein functional groups.*** The potential biological  
677 impact of LCRs was evaluated by mapping the frequency and location of STRs and  
678 homopolymers in the orthopoxvirus genome and considering the biological function of the  
679 affected genes. The frequency of inclusion of LCRs between distinct functional groups of  
680 genes was compared as previously described ([Senkevich et al., 2021](#)). Orthopoxviruses  
681 (n=231, Akhmeta virus [AKMV]: n=6 sequences; alaskapox virus [AKPV]: n=1; cowpox  
682 virus [CPXV]: n=82; ectromelia virus [ECTV]: n=5; MPXV: n=62; VACV: n=18; VARV:  
683 n=57) include 216 functionally annotated OPGs classified in 5 categories (“Housekeeping  
684 genes/Core” ANK/PRANC family, Bcl-2 domain family, PIE family, and “Accessory/Other”  
685 [e.g., virus-host interacting genes]). The frequency was calculated after normalizing count  
686 numbers with the sample size of the OPG alignment. Statistical analysis of the significance of  
687 differences was performed by applying a Kruskal–Wallis test ( $\chi^2$  *p*-values) followed by a  
688 non-parametric multiple pairwise comparison between groups (Wilcoxon test), with *p*-values  
689 subjected to FDR correction.

## 690 **ACKNOWLEDGMENTS**

691 We would like to thank the work of the Rapid Response Unit of the National Center for  
692 Microbiology, especially M<sup>a</sup>José Buitrago, and Cristobal Belda, ISCIII General Director. We  
693 also thank Anya Crane (Integrated Research Facility at Fort Detrick, National Institute of  
694 Allergy and Infectious Diseases, National Institutes of Health) for critically editing the  
695 manuscript and Jiro Wada (Integrated Research Facility at Fort Detrick, National Institute of  
696 Allergy and Infectious Diseases, National Institutes of Health) for helping with figure  
697 preparation.

698         The work for this study at Instituto de Salud Carlos III was partially funded by Acción  
699 Estratégica “Impacto clínico y microbiológico del brote por el virus de la viruela del mono en  
700 pacientes en España (2022): proyecto multicéntrico MONKPOX-ESP22” (CIBERINFEC).

701 The work for this study at the Department of Microbiology, Icahn School of Medicine at  
702 Mount Sinai as part of Global Health Emerging Pathogen Institute activities was funded by  
703 institutional funds (G.P.) from the Department of Microbiology, Icahn School of Medicine at  
704 Mount Sinai in support of Global Health Emerging Pathogen Institute activities.

705         This work was also supported in part through Laulima Government Solutions, LLC,  
706 prime contract with the U.S. National Institute of Allergy and Infectious Diseases (NIAID)  
707 under Contract No. HHSN272201800013C. J.H.K. performed this work as an employee of  
708 Tunnell Government Services (TGS), a subcontractor of Laulima Government Solutions,  
709 LLC, under Contract No. HHSN272201800013C.

710         Opinions, interpretations, conclusions, and recommendations are those of the authors  
711 and are not necessarily endorsed by the U.S. Army.

712         The views and conclusions contained in this document are those of the authors and  
713 should not be interpreted as necessarily representing the official policies, either expressed or  
714 implied, of the U.S. Department of Health and Human Services or of the institutions and

715 companies affiliated with the authors, nor does mention of trade names, commercial products,  
716 or organizations imply endorsement by the U.S. Government.

717

## 718 **AUTHOR CONTRIBUTIONS**

719 Conceptualization, S. M., S.V., A. N., I. J., M.S.L., A.G.S., I.C., M.S.S., G.P.

720 Methodology, S.M., S.V., A.N., J.A.P.G., S.V.F., A.Z., J. H. K., M.S.L., N.D., J.R.K., E.G.,  
721 S.G., G.P.

722 Investigation, S.M., S.V., A.N., J.A.P.G., S.V.F., A.Z., E.O., O.A., A.M.G., A.D.I., V.E.,  
723 C.G., F.M., P.S., M.T., A.V., J.C.G., I.T., M.C.R., L.M., M.L., A.G., L.C., A.G., J.C., L.H.,  
724 P.J.S., M.L.N.R., I.J., M.E.A.A., C.L., L.R., I.E., M.S., M.A.M., J.H.K., M.S.L., N.D.P.,  
725 J.R.K., E.G., S.G., A.G.S., I.C., M.S.S., G.P.

726 Formal analysis, S.M., S.V., A.N., J.A.P.G., S.V.F., J.H.K., M.S.L., N.D.P., J.R.K., E.G.,  
727 I.C., M.S.S., G.P.

728 Writing – original draft, S.M., S.V., A.N., G.P.

729 Writing – review & editing, S. M., S.V., A. N., A.G.S., I.C., M.S.S., G.P.

730 Visualization, S.M., S.V., A.N., G.P.

731 Supervision, A.G.S., I.C., M.S.S., G.P.

732 Resources, A.G.S., I.C., M.S.S., G.P.

733 Funding Acquisition, A.G.S., I.C., M.S.S., G.P.

734

## 735 **DECLARATION OF INTERESTS**

736 A.G.-S. has consulting agreements for the following companies involving cash and/or stock:

737 Castlevax, Amovir, Vivaldi Biosciences, Contrafect, 7Hills Pharma, Avimex, Vaxalto,

738 Pagoda, Accurius, Esperovax, Farmak, Applied Biological Laboratories, Pharmamar, Paratus,

739 CureLab Oncology, CureLab Veterinary, Synairgen, and Pfizer, outside of the reported work.



740 A.G.-S. has been an invited speaker in meeting events organized by Seqirus, Janssen, Abbott,  
741 and Astrazeneca. A.G.-S. is inventor on patents and patent applications on the use of  
742 antivirals and vaccines for the treatment and prevention of virus infections and cancer, owned  
743 by the Icahn School of Medicine at Mount Sinai, New York, outside of the reported work.  
744 The authors declare no competing interests.

745

## 746 **RESOURCE AVAILABILITY**

### 747 **Lead Contact**

748 Further information and requests for resources and reagents should be directed to and will be  
749 fulfilled by the lead contact, Gustavo Palacios ([gustavo.palacios@mssm.edu](mailto:gustavo.palacios@mssm.edu)).

750

### 751 **Materials Availability**

752 This study did not generate new unique reagents.

753

### 754 **Data and Code Availability**

755 All scripts and codes used for this study can be found at github repository:

756 (<https://github.com/BU-ISCI/MPXstreveal>).

757 **FIGURE LEGENDS**

758 **Figure 1. *De novo* assembly of subclade II lineage B.1 monkeypox virus (MPXV)**

759 **genome sequence 353R**

760 A visual representation of the fully annotated MPXV isolate 353R genome (based on the  
761 subclade II lineage A reference isolate MPXV-M5312\_HM12\_Rivers genome sequence  
762 annotation). Shown are (from the outside to the inside): high-quality genome (HQG) hybrid  
763 assembly (wide outer light blue ring); sequencing coverage distribution graph (thin ragged  
764 line [green:  $\geq 10,000\times$ , 99.42%; black:  $1,000\times-10,000$ , 0.28%; orange:  $<1,000\times-10$ , 0.1%;  
765 red:  $<10-0$ , 0.2%]); orthologous poxvirus gene (OPG) annotations according to the  
766 standardized nomenclature ([Senkevich et al., 2021](#)) (lettering and shaded boxes [orange:  
767 ANK/PRANC (N-terminal ankyrin protein with PRANC domain) inverted terminal repetition  
768 [ITR] regions; gold: Bcl-2 domain; blue: BTB/Kelch domains; green: housekeeping; purple:  
769 other; pink: TNFR and/or PIE domains); contigs from NovaSeq, MiSeq, and Nanopore  
770 sequencing (wide inner gray rings). Additionally, radial lines and shading that originate in the  
771 center and reach outward on the white background indicate low-complexity regions (LCRs;  
772 royal blue) and areas with more change (light blue).

773

774 **Figure 2. Characterization and validation of non-randomly distributed low-complexity**  
775 **regions (LCRs) in monkeypox virus (MPXV) genome sequence 353R**

776 (A) LCR3 sequence validation using MPXV 353R Nanopore sequencing data and 15  
777 additional raw data sequencing reads downloaded from the National Center for  
778 Biotechnology Information (NCBI) Sequence Read Archive (SRA). (B) LCR pair 1/4  
779 sequence validation using MPXV 353R Nanopore sequencing data and 20 additional raw data  
780 sequencing reads downloaded from NCBI SRA. Detailed information on the represented  
781 materials, along with originator and epidemiological data, is provided in **Table S6**.

782

783 **Figure 3. Low-complexity regions (LCRs) are non-randomly distributed in the**

784 **monkeypox virus (MPXV) genome**

785 (A) Frequencies (mean +/- standard error) at which LCRs occur in orthologous poxvirus

786 genes (OPGs) of different functional groups. Shown are functional classes in which pairwise

787 comparisons had a significantly different frequency than other groups (multiple pairwise

788 Wilcoxon test, false discovery rate [FDR] corrected  $p$ -value  $<0.05$ ). (B) Entropy value

789 distribution for short tandem repeats (STRs) in LCRs (left) and single-nucleotide

790 polymorphisms (SNPs; right). (C) Distributions of the pairwise inter-sample Euclidean

791 distances for each STR in LCRs (**Table S3**). SNPs in the boxplot represent the distribution of

792 average Euclidean distances of each variable position along the MPXV genome.

793

794 **Figure 4. Low-complexity regions (LCRs) might be more phylogenetically informative**

795 **than single-nucleotide polymorphisms (SNPs) for inter-host sequence analysis**

796 Monkeypox virus (MPXV) population genomics within the biological specimen (intra-host)

797 and across different specimens (inter-host). (A) Panel shading indicates the number of reads

798 supporting each LCR for each sample. Only paired reads that include a perfect match to both

799 flanking regions were counted; the gradient shows the maximum value in black and the

800 minimum value ( $n=1$ ) in the lightest blue. Samples without coverage are indicated in gray.

801 (B) Comparison of LCR allele frequency for samples 353R and 349R. Only LCRs with at

802 least 10 supporting paired reads including both flanking regions were counted; only alleles

803 with a frequency of 0.03 or higher were considered. The gradient shows the maximum value

804 in black and the minimum value ( $n=0.03$ ) in the lightest blue. (C) Comparison of LCR allele

805 frequency in all samples for LCRs with good coverage (7, pair 10/11, 12, 13, 14, 19, 20, and

806 21). Only LCRs with at least 10 supporting paired reads including both flanking regions were

807 counted; only alleles with a frequency of 0.03 or higher were considered. The gradient shows  
808 the maximum value in black and the minimum value (n=0.03) in the lightest blue.

809

810 **Figure 5. Conservation and variation in proteins encoded by orthologous poxvirus gene**  
811 **(OPG) and codon usage analysis in OPG low-complexity regions (LCRs)**

812 MetaLogo visualization of conserved and varying amino-acid residues in OPG-encoded  
813 proteins among monkeypox virus (MPXV) clade I, subclade IIa, and subclade IIb, with  
814 homologous and nonhomologous sites highlighted. (A) OPG153/ LCR7-derived variability.  
815 CMLV, camelpox virus; VACV, vaccinia virus; VARV, variola virus; CPXV, cowpox virus;  
816 MPXV, monkeypox virus. (B) OPG204/LCR21-derived variability; and (C) OPG208/LCR3-  
817 derived variability. Visualizations created at Biorender.com and Geneious version 2022.2  
818 created by Biomatters.

819 **TABLE LEGENDS**

820 **Table 1. Low-complexity regions (LCRs) in monkeypox virus (MPXV) genome sequence 353R**

821 Short tandem repeats (STRs) are described using nucleotide base-pair coordinates with reference to  
822 the high-quality genome (HQG) sequence (ENA Accession #OX044336). Listed are the number of  
823 repeat units, description of the sequence (with  $n$  = number of repeats for this particular genome),  
824 identification of the nearest annotated orthologous poxvirus gene (OPG), type of LCR (STR or  
825 homopolymer), position of the LCR to the nearest gene, and distance of the LCR to the nearest gene.  
826 OPG notations follow the standardized nomenclature ([Senkevich et al., 2021](#)); vaccinia virus  
827 (VACV) Copenhagen strain and classical VACV gene notations are shown in addition to enable  
828 comparisons.

829

830 **Table 2. Low-complexity region (LCR) validation and entropy-level intra-host analysis in**  
831 **monkeypox virus (MPXV) genome sequence 353R**

832 Listed are the type and number of supporting reads for each LCR. Definitions of quality: Yes, LCR is  
833 found entirely in the assembly in one contig; no, LCR is not assembled with the reported method. All  
834 LCRs with entropy levels above 0.15 are shaded in gray. OPG, orthologous poxvirus gene.

835

836 **Table 3. Comparison of monkeypox virus (MPXV) genome sequence 353R with reference**  
837 **sequences**

838 LCR repetitions for each genome are indicated. Discrepant number ( $n$ ) of LCR repeats are shaded in  
839 gray. indels, number of insertion (ins) or deletion (del) of bases; LCR, low-complexity region; SNP,  
840 single-nucleotide polymorphism.

841 **SUPPLEMENTAL FIGURE LEGENDS**

842 **Figure S1. Examples for read mapping artefacts and correction in monkeypox virus (MPXV)**  
843 **genome low-complexity regions (LCRs)**

844 (A) LCR2 alignment highlighting differences compared with various consensus sequences. (B) LCR7  
845 alignment highlighting differences of results obtained using three sequencing platforms compared to  
846 the subclade II lineage A monkeypox reference isolate MPXV-M5312\_HM12\_Rivers sequence.

847

848 **Figure S2. Phylogenetic analysis of monkeypox virus (MPXV)**

849 (A) Phylogenetic maximum-likelihood (ML) tree showing monkeypox virus (MPXV) subclade IIb  
850 single-nucleotide polymorphism (SNP) clustering. Bootstrap supports >60 are indicated by labels  
851 with their number of supports. (B) Haplotype network showing SNP differences among samples  
852 included in the phylogenetic tree. Details on groups can be found in **Table S4**.

853

854 **Figure S3. Conservation and variation in proteins encoded by orthologous poxvirus gene**

855 **(OPG) 208.** (A) MetaLogo visualization of conserved and varying amino-acid residues in OPG-  
856 encoded proteins among monkeypox virus (MPXV) clade I, subclade IIa, and subclade IIb, with  
857 homologous and nonhomologous sites highlighted; (B) Entropy heatmap; (C) Entropy analysis by  
858 site.

859

860 **Figure S4. Conservation and variation in proteins encoded by orthologous poxvirus gene**

861 **(OPG) 153.**

862 (A) Entropy heatmap. CMLV, camelpox virus; VARV, variola virus; VACV, vaccinia virus; CPXV,  
863 cowpox virus; MPXV, monkeypox virus. (B) . MPXV, monkeypox virus; CPXV, cowpox virus;  
864 VACV, vaccinia virus; VARV, variola virus; CMLV, camelpox virus.

865 **SUPPLEMENTAL TABLE LEGENDS**

866 **Table S1. NovaSeq sequencing quality control values**

867

868 **Table S2. Low-complexity regions (LCRs) in the monkeypox virus (MPXV) high-quality**  
869 **genome (HQG) sequence 353R**

870 Listed are annotated positions (according to the reference MPXV-M5312\_HM12\_Rivers isolate

871 genome sequence), sequence, and flanking regions of each area, as described previously ([Phillips et](#)

872 [al., 2018](#)). ID, identification; STR, short tandem repeats.

873

874 **Table S3. Short tandem repeats (STRs) in low-complexity regions (LCRs)**

875 Detailed information on STRs of the entire dataset used for analysis in **Figure 2**.

876

877 **Table S4. Phylogenetic analysis**

878 Detailed information on groups depicted in **Figure S2**. SNP, single nucleotide polymorphism.

879

880 **Table S5. Genomes used in the study**

881 GI, genome identifier; NA, not applicable

882

883 **Table S6. Characterization and validation of non-randomly distributed low-complexity regions**  
884 **(LCRs) in the monkeypox virus (MPXV) 353R genome sequence**

885 Detailed information on the represented materials, along with originator and epidemiological data,

886 used for analysis in **Figure 2**. SRA, Sequence Read Archive (SRA); ID, identification; QC, quality

887 control.

888 **SUPPLEMENTAL FILE LEGENDS**

889 **File S1. Analysis parameters for validation of short tandem repeats (STRs) in National Center**

890 **for Biotechnology Information (NCBI) Sequence Read Archive (SRA)**



891 **REFERENCES**

- 892 Aksamentov, I., Roemer, C., Hodcroft, E.B., and Neher, R.A. (2021). Nextclade: clade assignment,  
893 mutation calling and quality control for viral genomes. *J Open Source Softw* 6, 3773.  
894 [10.21105/joss.03773](https://doi.org/10.21105/joss.03773).
- 895 Andrews, S. (2010). FASTQC: a quality control tool for high throughput sequence data.  
896 <https://www.bioinformatics.babraham.ac.uk/projects/fastqc/>.
- 897 Antinori, A., Mazzotta, V., Vita, S., Carletti, F., Tacconi, D., Lapini, L.E., D'Abramo, A., Cicalini,  
898 S., Lapa, D., Pittalis, S., et al. (2022). Epidemiological, clinical and virological characteristics of four  
899 cases of monkeypox support transmission through sexual contact, Italy, May 2022. *Euro Surveill* 27,  
900 2200421. [10.2807/1560-7917.ES.2022.27.22.2200421](https://doi.org/10.2807/1560-7917.ES.2022.27.22.2200421).
- 901 Antipov, D., Korobeynikov, A., McLean, J.S., and Pevzner, P.A. (2016). hybridSPAdes: an  
902 algorithm for hybrid assembly of short and long reads. *Bioinformatics* 32, 1009-1015.  
903 [10.1093/bioinformatics/btv688](https://doi.org/10.1093/bioinformatics/btv688).
- 904 Assefa, S., Keane, T.M., Otto, T.D., Newbold, C., and Berriman, M. (2009). ABACAS: algorithm-  
905 based automatic contiguation of assembled sequences. *Bioinformatics* 25, 1968-1969.  
906 [10.1093/bioinformatics/btp347](https://doi.org/10.1093/bioinformatics/btp347).
- 907 Bandelt, H.-J., Forster, P., and Röhl, A. (1999). Median-joining networks for inferring intraspecific  
908 phylogenies. *Mol Biol Evol* 16, 37-48. [10.1093/oxfordjournals.molbev.a026036](https://doi.org/10.1093/oxfordjournals.molbev.a026036).
- 909 Baroudy, B.M., and Moss, B. (1982). Sequence homologies of diverse length tandem repetitions near  
910 ends of vaccinia virus genome suggest unequal crossing over. *Nucleic Acids Res* 10, 5673-5679.  
911 [10.1093/nar/10.18.5673](https://doi.org/10.1093/nar/10.18.5673).
- 912 Beer, E.M., and Rao, V.B. (2019). A systematic review of the epidemiology of human monkeypox  
913 outbreaks and implications for outbreak strategy. *PLoS Negl Trop Dis* 13, e0007791.  
914 [10.1371/journal.pntd.0007791](https://doi.org/10.1371/journal.pntd.0007791).

- 915 Benson, G. (1999). Tandem repeats finder: a program to analyze DNA sequences. *Nucleic Acids Res*  
916 *27*, 573-580. 10.1093/nar/27.2.573.
- 917 Bratke, K.A., and McLysaght, A. (2008). Identification of multiple independent horizontal gene  
918 transfers into poxviruses using a comparative genomics approach. *BMC Evol Biol* *8*, 67.  
919 10.1186/1471-2148-8-67.
- 920 Brooks, M.A., Ali, A.N., Turner, P.C., and Moyer, R.W. (1995). A rabbitpox virus serpin gene  
921 controls host range by inhibiting apoptosis in restrictive cells. *J Virol* *69*, 7688-7698.  
922 10.1128/JVI.69.12.7688-7698.1995.
- 923 Bunge, E.M., Hoet, B., Chen, L., Lienert, F., Weidenthaler, H., Baer, L.R., and Steffen, R. (2022).  
924 The changing epidemiology of human monkeypox—A potential threat? A systematic review. *PLoS*  
925 *Negl Trop Dis* *16*, e0010141. 10.1371/journal.pntd.0010141.
- 926 Centers for Disease Control and Prevention (2022). 2022 Monkeypox Outbreak Global Map.  
927 <https://www.cdc.gov/poxvirus/monkeypox/response/2022/world-map.html>.
- 928 Chen, N., Li, G., Liszewski, M.K., Atkinson, J.P., Jahrling, P.B., Feng, Z., Schriewer, J., Buck, C.,  
929 Wang, C., Lefkowitz, E.J., et al. (2005). Virulence differences between monkeypox virus isolates  
930 from West Africa and the Congo basin. *Virology* *340*, 46-63. 10.1016/j.virol.2005.05.030.
- 931 Chen, S., Zhou, Y., Chen, Y., and Gu, J. (2018). fastp: an ultra-fast all-in-one FASTQ preprocessor.  
932 *Bioinformatics* *34*, i884-i890. 10.1093/bioinformatics/bty560.
- 933 Chen, Y., He, Z., Men, Y., Dong, G., Hu, S., and Ying, X. (2022). MetaLogo: a heterogeneity-aware  
934 sequence logo generator and aligner. *Brief Bioinform* *23*, 1-7. 10.1093/bib/bbab591.
- 935 Chiu, W.-L., Lin, C.-L., Yang, M.-H., Tzou, D.-L., and Chang, W. (2007). Vaccinia virus 4c (A26L)  
936 protein on intracellular mature virus binds to the extracellular cellular matrix laminin. *J Virol* *81*,  
937 2149-2157. 10.1128/JVI.02302-06.

- 938 Cingolani, P., Patel, V.M., Coon, M., Nguyen, T., Land, S.J., Ruden, D.M., and Lu, X. (2012a).  
939 Using *Drosophila melanogaster* as a model for genotoxic chemical mutational studies with a new  
940 program, SnpSift. *Front Genet* 3, 35. 10.3389/fgene.2012.00035.
- 941 Cingolani, P., Platts, A., Wang, L.L., Coon, M., Nguyen, T., Wang, L., Land, S.J., Lu, X., and  
942 Ruden, D.M. (2012b). A program for annotating and predicting the effects of single nucleotide  
943 polymorphisms, SnpEff: SNPs in the genome of *Drosophila melanogaster* strain *w<sup>1118</sup>*; *iso-2*; *iso-3*.  
944 *Fly (Austin)* 6, 80-92. 10.4161/fly.19695.
- 945 Cohen-Gihon, I., Israeli, O., Shifman, O., Erez, N., Melamed, S., Paran, N., Beth-Din, A., and Zvi, A.  
946 (2020). Identification and whole-genome sequencing of a monkeypox virus strain isolated in Israel.  
947 *Microbiol Resour Announc* 9, e01524-01519. 10.1128/MRA.01524-19.
- 948 Colamonici, O.R., Domanski, P., Sweitzer, S.M., Larner, A., and Buller, R.M. (1995). Vaccinia virus  
949 B18R gene encodes a type I interferon-binding protein that blocks interferon  $\alpha$  transmembrane  
950 signaling. *J Biol Chem* 270, 15974-15978. 10.1074/jbc.270.27.15974.
- 951 Dainat, J., Hereñú, D., LucileSol, and pascal-git (2022). NBISweden/AGAT: AGAT-v0.8.1.  
952 <https://zenodo.org/record/5834795#.YzJOCzTMJyE>. 10.5281/zenodo.5834795.
- 953 Damon, I.K. (2011). Status of human monkeypox: clinical disease, epidemiology and research.  
954 *Vaccine* 29 *Suppl 4*, D54-59. 10.1016/j.vaccine.2011.04.014.
- 955 Danecek, P., Bonfield, J.K., Liddle, J., Marshall, J., Ohan, V., Pollard, M.O., Whitwham, A., Keane,  
956 T., McCarthy, S.A., Davies, R.M., and Li, H. (2021). Twelve years of SAMtools and BCFtools.  
957 *GigaScience* 10, giab008. 10.1093/gigascience/giab008.
- 958 Davies, H.M., Nofal, S.D., McLaughlin, E.J., and Osborne, A.R. (2017). Repetitive sequences in  
959 malaria parasite proteins. *FEMS Microbiol Rev* 41, 923-940. 10.1093/femsre/fux046.
- 960 Davies, H.M., Thalassinou, K., and Osborne, A.R. (2016). Expansion of lysine-rich repeats in  
961 *Plasmodium* proteins generates novel localization sequences that target the periphery of the host  
962 erythrocyte. *J Biol Chem* 291, 26188-26207. 10.1074/jbc.M116.761213.

- 963 Di Tommaso, P., Chatzou, M., Floden, E.W., Barja, P.P., Palumbo, E., and Notredame, C. (2017).  
964 Nextflow enables reproducible computational workflows. *Nat Biotechnol* 35, 316-319.  
965 10.1038/nbt.3820.
- 966 Elde, N.C., Child, S.J., Eickbush, M.T., Kitzman, J.O., Rogers, K.S., Shendure, J., Geballe, A.P., and  
967 Malik, H.S. (2012). Poxviruses deploy genomic accordions to adapt rapidly against host antiviral  
968 defenses. *Cell* 150, 831-841. 10.1016/j.cell.2012.05.049.
- 969 Esposito, J.J., Sammons, S.A., Frace, A.M., Osborne, J.D., Olsen-Rasmussen, M., Zhang, M., Govil,  
970 D., Damon, I.K., Kline, R., Laker, M., et al. (2006). Genome sequence diversity and clues to the  
971 evolution of variola (smallpox) virus. *Science* 313, 807-812. 10.1126/science.1125134.
- 972 Ewels, P., Magnusson, M., Lundin, S., and Käller, M. (2016). MultiQC: summarize analysis results  
973 for multiple tools and samples in a single report. *Bioinformatics* 32, 3047-3048.  
974 10.1093/bioinformatics/btw354.
- 975 Ewels, P.A., Peltzer, A., Fillinger, S., Patel, H., Alneberg, J., Wilm, A., Garcia, M.U., Di Tommaso,  
976 P., and Nahnsen, S. (2020). The nf-core framework for community-curated bioinformatics pipelines.  
977 *Nat Biotechnol* 38, 276-278. 10.1038/s41587-020-0439-x.
- 978 Faye, O., Pratt, C.B., Faye, M., Fall, G., Chitty, J.A., Diagne, M.M., Wiley, M.R., Yinka-Ogunleye,  
979 A.F., Aruna, S., Etebu, E.N., et al. (2018). Genomic characterisation of human monkeypox virus in  
980 Nigeria. *Lancet Infect Dis* 18, 246. 10.1016/S1473-3099(18)30043-4.
- 981 Fedele, C.G., Negrodo, A., Molero, F., Sánchez-Seco, M.P., and Tenorio, A. (2006). Use of internally  
982 controlled real-time genome amplification for detection of variola virus and other orthopoxviruses  
983 infecting humans. *J Clin Microbiol* 44, 4464-4470. 10.1128/JCM.00276-06.
- 984 Fidalgo, M., Barrales, R.R., Ibeas, J.I., and Jimenez, J. (2006). Adaptive evolution by mutations in  
985 the *FLO11* gene. *Proc Natl Acad Sci U S A* 103, 11228-11233. 10.1073/pnas.0601713103.
- 986 Gatchel, J.R., and Zoghbi, H.Y. (2005). Diseases of unstable repeat expansion: mechanisms and  
987 common principles. *Nat Rev Genet* 6, 743-755. 10.1038/nrg1691.

988 Gemayel, R., Chavali, S., Pougach, K., Legendre, M., Zhu, B., Boeynaems, S., van der Zande, E.,  
989 Gevaert, K., Rousseau, F., Schymkowitz, J., et al. (2015). Variable glutamine-rich repeats modulate  
990 transcription factor activity. *Mol Cell* 59, 615-627. 10.1016/j.molcel.2015.07.003.

991 Gigante, C.M., Korber, B., Seabolt, M.H., Wilkins, K., Davidson, W., Rao, A.K., Zhao, H., Hughes,  
992 C.M., Minhaj, F., Waltenburg, M.A., et al. (2022). Multiple lineages of *Monkeypox virus* detected in  
993 the United States, 2021- 2022. bioRxiv, 2022.2006.2010.495526. 10.1101/2022.06.10.495526.

994 Grant, R., Nguyen, L.L., and Breban, R. (2020). Modelling human-to-human transmission of  
995 monkeypox. *Bull World Health Organ* 98, 638-640. 10.2471/blt.19.242347.

996 Grubaugh, N.D., Gangavarapu, K., Quick, J., Matteson, N.L., De Jesus, J.G., Main, B.J., Tan, A.L.,  
997 Paul, L.M., Brackney, D.E., Grewal, S., et al. (2019). An amplicon-based sequencing framework for  
998 accurately measuring intrahost virus diversity using PrimalSeq and iVar. *Genome Biol* 20, 8.  
999 10.1186/s13059-018-1618-7.

1000 Gubser, C., Hué, S., Kellam, P., and Smith, G.L. (2004). Poxvirus genomes: a phylogenetic analysis.  
1001 *J Gen Virol* 85, 105-117. 10.1099/vir.0.19565-0.

1002 Happi, C., Adetifa, I., Mbala, P., Njouom, R., Nakoune, E., Happi, A., Ndodo, N., Ayansola, O.,  
1003 Mboowa, G., Bedford, T., et al. (2022). Urgent need for a non-discriminatory and non-stigmatizing  
1004 nomenclature for monkeypox virus. *PLoS Biol* 20, e3001769. 10.1371/journal.pbio.3001769.

1005 Hendrickson, R.C., Wang, C., Hatcher, E.L., and Lefkowitz, E.J. (2010). Orthopoxvirus genome  
1006 evolution: the role of gene loss. *Viruses* 2, 1933-1967. 10.3390/v2091933.

1007 Henry, S.P., Takanosu, M., Boyd, T.C., Mayne, P.M., Eberspaecher, H., Zhou, W., de Crombrughe,  
1008 B., Höök, M., and Mayne, R. (2001). Expression pattern and gene characterization of *Asporin*: a  
1009 newly discovered member of the leucine-rich repeat protein family. *J Biol Chem* 276, 12212-12221.  
1010 10.1074/jbc.M011290200.

- 1011 Hernáez, B., Alonso-Lobo, J.M., Montanuy, I., Fischer, C., Sauer, S., Sigal, L., Sevilla, N., and  
1012 Alcamí, A. (2018). A virus-encoded type I interferon decoy receptor enables evasion of host  
1013 immunity through cell-surface binding. *Nat Commun* 9, 5440. 10.1038/s41467-018-07772-z.
- 1014 Howard, A.R., Senkevich, T.G., and Moss, B. (2008). Vaccinia virus A26 and A27 proteins form a  
1015 stable complex tethered to mature virions by association with the A17 transmembrane protein. *J Virol*  
1016 82, 12384-12391. 10.1128/JVI.01524-08.
- 1017 International Committee on Taxonomy of Viruses (2022). Current ICTV Taxonomy Release. Current  
1018 ICTV Taxonomy Release. <https://ictv.global/taxonomy>.
- 1019 Isidro, J., Borges, V., Pinto, M., Sobral, D., Santos, J.D., Nunes, A., Mixão, V., Ferreira, R., Santos,  
1020 D., Duarte, S., et al. (2022). Phylogenomic characterization and signs of microevolution in the 2022  
1021 multi-country outbreak of monkeypox virus. *Nat Med* 28, 1569-1572. 10.1038/s41591-022-01907-y.
- 1022 Jones, T.C., Schneider, J., Mühlemann, B., Veith, T., Beheim-Schwarzbach, J., Tesch, J., Schmidt,  
1023 M.L., Walper, F., Bleicker, T., Isner, C., et al. (2022). Genetic variability, including gene duplication  
1024 and deletion, in early sequences from the 2022 European monkeypox outbreak. *bioRxiv*,  
1025 2022.2007.2023.501239. 10.1101/2022.07.23.501239.
- 1026 Jorgensen, I., Rayamajhi, M., and Miao, E.A. (2017). Programmed cell death as a defence against  
1027 infection. *Nat Rev Immunol* 17, 151-164. 10.1038/nri.2016.147.
- 1028 Kastenmayer, R.J., Maruri-Avidal, L., Americo, J.L., Earl, P.L., Weisberg, A.S., and Moss, B.  
1029 (2014). Elimination of A-type inclusion formation enhances cowpox virus replication in mice:  
1030 implications for orthopoxvirus evolution. *Virology* 452-453, 59-66. 10.1016/j.virol.2013.12.030.
- 1031 Katoh, K., Rozewicki, J., and Yamada, K.D. (2019). MAFFT online service: multiple sequence  
1032 alignment, interactive sequence choice and visualization. *Brief Bioinform* 20, 1160-1166.  
1033 10.1093/bib/bbx108.
- 1034 Keasey, S., Pugh, C., Tikhonov, A., Chen, G., Schweitzer, B., Nalca, A., and Ulrich, R.G. (2010).  
1035 Proteomic basis of the antibody response to monkeypox virus infection examined in cynomolgus

- 1036 macaques and a comparison to human smallpox vaccination. *PLoS One* 5, e15547.  
1037 [10.1371/journal.pone.0015547](https://doi.org/10.1371/journal.pone.0015547).
- 1038 Kettle, S., Blake, N.W., Law, K.M., and Smith, G.L. (1995). Vaccinia virus serpins B13R (SPI-2)  
1039 and B22R (SPI-1) encode Mr 38.5 and 40K, intracellular polypeptides that do not affect virus  
1040 virulence in a murine intranasal model. *Virology* 206, 136-147. [10.1016/s0042-6822\(95\)80028-x](https://doi.org/10.1016/s0042-6822(95)80028-x).
- 1041 Khodakevich, L., Ježek, Z., and Messinger, D. (1988). Monkeypox virus: ecology and public health  
1042 significance. *Bull World Health Organ* 66, 747-752.
- 1043 Kolmogorov, M., Yuan, J., Lin, Y., and Pevzner, P.A. (2019). Assembly of long, error-prone reads  
1044 using repeat graphs. *Nat Biotechnol* 37, 540-546. [10.1038/s41587-019-0072-8](https://doi.org/10.1038/s41587-019-0072-8).
- 1045 Kotwal, G.J., and Moss, B. (1989). Vaccinia virus encodes two proteins that are structurally related  
1046 to members of the plasma serine protease inhibitor superfamily. *J Virol* 63, 600-606.  
1047 [10.1128/JVI.63.2.600-606.1989](https://doi.org/10.1128/JVI.63.2.600-606.1989).
- 1048 Kugelman, J.R., Johnston, S.C., Mulembakani, P.M., Kisalu, N., Lee, M.S., Koroleva, G., McCarthy,  
1049 S.E., Gestole, M.C., Wolfe, N.D., Fair, J.N., et al. (2014). Genomic variability of monkeypox virus  
1050 among humans, Democratic Republic of the Congo. *Emerg Infect Dis* 20, 232-239.  
1051 [10.3201/eid2002.130118](https://doi.org/10.3201/eid2002.130118).
- 1052 Ladner, J.T., Beitzel, B., Chain, P.S.G., Davenport, M.G., Donaldson, E.F., Frieman, M., Kugelman,  
1053 J.R., Kuhn, J.H., O'Rear, J., Sabeti, P.C., et al. (2014). Standards for sequencing viral genomes in the  
1054 era of high-throughput sequencing. *mBio* 5, e01360-01314. [10.1128/mBio.01360-14](https://doi.org/10.1128/mBio.01360-14).
- 1055 Langmead, B., and Salzberg, S.L. (2012). Fast gapped-read alignment with Bowtie 2. *Nat Methods* 9,  
1056 357-359. [10.1038/nmeth.1923](https://doi.org/10.1038/nmeth.1923).
- 1057 Letunic, I., and Bork, P. (2021). Interactive Tree Of Life (iTOL) v5: an online tool for phylogenetic  
1058 tree display and annotation. *Nucleic Acids Res* 49, W293-W296. [10.1093/nar/gkab301](https://doi.org/10.1093/nar/gkab301).
- 1059 Li, H., Handsaker, B., Wysoker, A., Fennell, T., Ruan, J., Homer, N., Marth, G., Abecasis, G.,  
1060 Durbin, R., and 1000 Genome Project Data Processing Subgroup (2009). The Sequence

- 1061 Alignment/Map format and SAMtools. *Bioinformatics* 25, 2078-2079.  
1062 10.1093/bioinformatics/btp352.
- 1063 Likos, A.M., Sammons, S.A., Olson, V.A., Frace, A.M., Li, Y., Olsen-Rasmussen, M., Davidson, W.,  
1064 Galloway, R., Khristova, M.L., Reynolds, M.G., et al. (2005). A tale of two clades: monkeypox  
1065 viruses. *J Gen Virol* 86, 2661-2672. 10.1099/vir.0.81215-0.
- 1066 Liu, L., Cooper, T., Howley, P.M., and Hayball, J.D. (2014). From crescent to mature virion:  
1067 vaccinia virus assembly and maturation. *Viruses* 6, 3787-3808. 10.3390/v6103787.
- 1068 Liu, R., Mendez-Rios, J.D., Peng, C., Xiao, W., Weisberg, A.S., Wyatt, L.S., and Moss, B. (2019).  
1069 SPI-1 is a missing host-range factor required for replication of the attenuated modified vaccinia  
1070 Ankara (MVA) vaccine vector in human cells. *PLoS Pathog* 15, e1007710.  
1071 10.1371/journal.ppat.1007710.
- 1072 Magnus, P.v., Andersen, E.K., Petersen, K.B., and Birch-Andersen, A. (2009). A pox-like disease in  
1073 cynomolgus monkeys. *Acta Pathol Microbiol Scand* 46, 156-176. 10.1111/j.1699-  
1074 0463.1959.tb00328.x.
- 1075 Mauldin, M.R., McCollum, A.M., Nakazawa, Y.J., Mandra, A., Whitehouse, E.R., Davidson, W.,  
1076 Zhao, H., Gao, J., Li, Y., Doty, J., et al. (2022). Exportation of monkeypox virus from the African  
1077 continent. *J Infect Dis* 225, 1367-1376. 10.1093/infdis/jiaa559.
- 1078 McFadden, G. (2005). Poxvirus tropism. *Nat Rev Microbiol* 3, 201-213. 10.1038/nrmicro1099.
- 1079 McLysaght, A., Baldi, P.F., and Gaut, B.S. (2003). Extensive gene gain associated with adaptive  
1080 evolution of poxviruses. *Proc Natl Acad Sci U S A* 100, 15655-15660. 10.1073/pnas.2136653100.
- 1081 Minh, B.Q., Schmidt, H.A., Chernomor, O., Schrempf, D., Woodhams, M.D., von Haeseler, A., and  
1082 Lanfear, R. (2020). IQ-TREE 2: new models and efficient methods for phylogenetic inference in the  
1083 genomic era. *Mol Biol Evol* 37, 1530-1534. 10.1093/molbev/msaa015.
- 1084 Moss, B. (2006). Poxvirus entry and membrane fusion. *Virology* 344, 48-54.  
1085 10.1016/j.virol.2005.09.037.



- 1086 Moss, B. (2016). Membrane fusion during poxvirus entry. *Semin Cell Dev Biol* 60, 89-96.
- 1087 [10.1016/j.semcdb.2016.07.015](https://doi.org/10.1016/j.semcdb.2016.07.015).
- 1088 Moss, B., and Smith, G.L. (2021). *Poxviridae: the viruses and their replication*. In *Fields virology*.
- 1089 Volume 2: DNA viruses P.M. Howley, D.M. Knipe, B.A. Damania, and J.I. Cohen, eds. (Wolters
- 1090 Kluwer), pp. 573-613.
- 1091 Nextstrain (2022). Genomic epidemiology of monkeypox virus.
- 1092 <https://nextstrain.org/monkeypox/hmpxv1>.
- 1093 Ng, O.T., Lee, V., Marimuthu, K., Vasoo, S., Chan, G., Lin, R.T.P., and Leo, Y.S. (2019). A case of
- 1094 imported monkeypox in Singapore. *Lancet Infect Dis* 19, 1166. [10.1016/S1473-3099\(19\)30537-7](https://doi.org/10.1016/S1473-3099(19)30537-7).
- 1095 Nuzzo, J.B., Borio, L.L., and Gostin, L.O. (2022). The WHO declaration of monkeypox as a Global
- 1096 Public Health Emergency. *JAMA* 328, 615-617. [10.1001/jama.2022.12513](https://doi.org/10.1001/jama.2022.12513).
- 1097 O'Tool, Á., and Rambaut, A. (2022). Initial observations about putative APOBEC3 deaminase
- 1098 editing driving short-term evolution of MPXV since 2017. [https://virological.org/t/initial-](https://virological.org/t/initial-observations-about-putative-apobec3-deaminase-editing-driving-short-term-evolution-of-mpxv-since-2017/830)
- 1099 [observations-about-putative-apobec3-deaminase-editing-driving-short-term-evolution-of-mpxv-](https://virological.org/t/initial-observations-about-putative-apobec3-deaminase-editing-driving-short-term-evolution-of-mpxv-since-2017/830)
- 1100 [since-2017/830](https://virological.org/t/initial-observations-about-putative-apobec3-deaminase-editing-driving-short-term-evolution-of-mpxv-since-2017/830).
- 1101 Oma, Y., Kino, Y., Sasagawa, N., and Ishiura, S. (2004). Intracellular localization of homopolymeric
- 1102 amino acid-containing proteins expressed in mammalian cells. *J Biol Chem* 279, 21217-21222.
- 1103 [10.1074/jbc.M309887200](https://doi.org/10.1074/jbc.M309887200).
- 1104 Otu, A., Ebenso, B., Walley, J., Barceló, J.M., and Ochu, C.L. (2022). Global human monkeypox
- 1105 outbreak: atypical presentation demanding urgent public health action. *Lancet Microbe* 3, e554-e555.
- 1106 [10.1016/S2666-5247\(22\)00153-7](https://doi.org/10.1016/S2666-5247(22)00153-7).
- 1107 Patel, H., Varona, S., Monzón, S., Espinosa-Carrasco, J., Heuer, M.L., Underwood, A., Gabernet, G.,
- 1108 nf-core bot, Ewels, P., MiguelJulia, et al. (2022). nf-core/viralrecon: nf-core/viralrecon v2.4.1 -
- 1109 Plastered Magnesium Marmoset. <https://zenodo.org/record/6320980#.YzJOTzTMJyE>.
- 1110 [10.5281/zenodo.6320980](https://doi.org/10.5281/zenodo.6320980).

- 1111 Patrono, L.V., Pléh, K., Samuni, L., Ulrich, M., Röthemeier, C., Sachse, A., Muschter, S., Nitsche,  
1112 A., Couacy-Hymann, E., Boesch, C., et al. (2020). Monkeypox virus emergence in wild chimpanzees  
1113 reveals distinct clinical outcomes and viral diversity. *Nat Microbiol* 5, 955-965. 10.1038/s41564-020-  
1114 0706-0.
- 1115 Phillips, C., Gettings, K.B., King, J.L., Ballard, D., Bodner, M., Borsuk, L., and Parson, W. (2018).  
1116 "The devil's in the detail": release of an expanded, enhanced and dynamically revised forensic STR  
1117 Sequence Guide. *Forensic Sci Int Genet* 34, 162-169. 10.1016/j.fsigen.2018.02.017.
- 1118 Prjibelski, A., Antipov, D., Meleshko, D., Lapidus, A., and Korobeynikov, A. (2020). Using SPAdes  
1119 De Novo Assembler. *Curr Protoc Bioinformatics* 70, e102. 10.1002/cpbi.102.
- 1120 Pugh, C., Brown, E.S., Quinn, X., Korman, L., Dyas, B.K., Ulrich, R.G., and Pittman, P.R. (2016).  
1121 Povidone iodine ointment application to the vaccination site does not alter immunoglobulin G  
1122 antibody response to smallpox vaccine. *Viral Immunol* 29, 361-366. 10.1089/vim.2016.0025.
- 1123 Radonić, A., Metzger, S., Dabrowski, P.W., Couacy-Hymann, E., Schuenadel, L., Kurth, A., Mätz-  
1124 Rensing, K., Boesch, C., Leendertz, F.H., and Nitsche, A. (2014). Fatal monkeypox in wild-living  
1125 sooty mangabey, Côte d'Ivoire, 2012. *Emerg Infect Dis* 20, 1009-1011. 10.3201/eid2006.13-1329.
- 1126 Reynolds, M.G., Yorita, K.L., Kuehnert, M.J., Davidson, W.B., Huhn, G.D., Holman, R.C., and  
1127 Damon, I.K. (2006). Clinical manifestations of human monkeypox influenced by route of infection. *J*  
1128 *Infect Dis* 194, 773-780. 10.1086/505880.
- 1129 Rimoin, A.W., Mulembakani, P.M., Johnston, S.C., Lloyd Smith, J.O., Kisalu, N.K., Kinkela, T.L.,  
1130 Blumberg, S., Thomassen, H.A., Pike, B.L., Fair, J.N., et al. (2010). Major increase in human  
1131 monkeypox incidence 30 years after smallpox vaccination campaigns cease in the Democratic  
1132 Republic of Congo. *Proc Natl Acad Sci U S A* 107, 16262-16267. 10.1073/pnas.1005769107.
- 1133 Roberts, K.L., and Smith, G.L. (2008). Vaccinia virus morphogenesis and dissemination. *Trends*  
1134 *Microbiol* 16, 472-479. 10.1016/j.tim.2008.07.009.

- 1135 Salichs, E., Ledda, A., Mularoni, L., Albà, M.M., and de la Luna, S. (2009). Genome-wide analysis  
1136 of histidine repeats reveals their role in the localization of human proteins to the nuclear speckles  
1137 compartment. *PLoS Genet* 5, e1000397. [10.1371/journal.pgen.1000397](https://doi.org/10.1371/journal.pgen.1000397).
- 1138 Sánchez-Seco, M.P., Hernández, L., Eiros, J.M., Negro, A., Fedele, G., and Tenorio, A. (2006).  
1139 Detection and identification of orthopoxviruses using a generic nested PCR followed by sequencing.  
1140 *Br J Biomed Sci* 63, 79-85. [10.1080/09674845.2006.11732725](https://doi.org/10.1080/09674845.2006.11732725).
- 1141 Seeman, T. (2015). Snippy: rapid haploid variant calling and core genome alignment.  
1142 <https://github.com/tseemann/snippy>.
- 1143 Senkevich, T.G., Yutin, N., Wolf, Y.I., Koonin, E.V., and Moss, B. (2021). Ancient gene capture and  
1144 recent gene loss shape the evolution of orthopoxvirus-host interaction genes. *mBio* 12, e0149521.  
1145 [10.1128/mBio.01495-21](https://doi.org/10.1128/mBio.01495-21).
- 1146 Senkevich, T.G., Zhivkoplis, E.K., Weisberg, A.S., and Moss, B. (2020). Inactivation of genes by  
1147 frameshift mutations provides rapid adaptation of an attenuated vaccinia virus. *J Virol* 94, e01053-  
1148 01020. [10.1128/JVI.01053-20](https://doi.org/10.1128/JVI.01053-20).
- 1149 Shchelkunov, S.N. (2012). Orthopoxvirus genes that mediate disease virulence and host tropism. *Adv*  
1150 *Virol* 2012, 524743. [10.1155/2012/524743](https://doi.org/10.1155/2012/524743).
- 1151 Shchelkunov, S.N., Totmenin, A.V., Babkin, I.V., Safronov, P.F., Ryazankina, O.I., Petrov, N.A.,  
1152 Gutorov, V.V., Uvarova, E.A., Mikheev, M.V., Sisler, J.R., et al. (2001). Human monkeypox and  
1153 smallpox viruses: genomic comparison. *FEBS Lett* 509, 66-70. [10.1016/s0014-5793\(01\)03144-1](https://doi.org/10.1016/s0014-5793(01)03144-1).
- 1154 Shchelkunov, S.N., Totmenin, A.V., Safronov, P.F., Mikheev, M.V., Gutorov, V.V., Ryazankina,  
1155 O.I., Petrov, N.A., Babkin, I.V., Uvarova, E.A., Sandakhchiev, L.S., et al. (2002). Analysis of the  
1156 monkeypox virus genome. *Virology* 297, 172-194. [10.1006/viro.2002.1446](https://doi.org/10.1006/viro.2002.1446).
- 1157 Shoubbridge, C., Cloosterman, D., Parkinson-Lawrence, E., Brooks, D., and Gécz, J. (2007).  
1158 Molecular pathology of expanded polyalanine tract mutations in the Aristaless-related homeobox  
1159 gene. *Genomics* 90, 59-71. [10.1016/j.ygeno.2007.03.005](https://doi.org/10.1016/j.ygeno.2007.03.005).

- 1160 Shumate, A., and Salzberg, S.L. (2021). Liftoff: accurate mapping of gene annotations.  
1161 *Bioinformatics* 37, 1639-1643. 10.1093/bioinformatics/btaa1016.
- 1162 Stothard, P. (2000). The sequence manipulation suite: JavaScript programs for analyzing and  
1163 formatting protein and DNA sequences. *Biotechniques* 28, 1102, 1104. 10.2144/00286ir01.
- 1164 The Broad Institute (2018). Picard command-line tools. <https://broadinstitute.github.io/picard/>.
- 1165 Thornhill, J.P., Barkati, S., Walmsley, S., Rockstroh, J., Antinori, A., Harrison, L.B., Palich, R., Nori,  
1166 A., Reeves, I., Habibi, M.S., et al. (2022). Monkeypox virus infection in humans across 16 countries  
1167 — April–June 2022. *N Engl J Med* 387, 679-691. 10.1056/NEJMoa2207323.
- 1168 Ulaeto, D., Grosenbach, D., and Hruby, D.E. (1996). The vaccinia virus 4c and A-type inclusion  
1169 proteins are specific markers for the intracellular mature virus particle. *J Virol* 70, 3372-3377.  
1170 10.1128/JVI.70.6.3372-3377.1996.
- 1171 Ulaeto, D.O., Dunning, J., and Carroll, M.W. (2022). Evolutionary implications of human  
1172 transmission of monkeypox: the importance of sequencing multiple lesions. *Lancet Microbe* 3, e639-  
1173 e640. 10.1016/S2666-5247(22)00194-X.
- 1174 Vaughan, A., Aarons, E., Astbury, J., Balasegaram, S., Beadsworth, M., Beck, C.R., Chand, M.,  
1175 O'Connor, C., Dunning, J., Ghebrehewet, S., et al. (2018). Two cases of monkeypox imported to the  
1176 United Kingdom, September 2018. *Euro Surveill* 23, 1800509. 10.2807/1560-  
1177 7917.ES.2018.23.38.1800509.
- 1178 Verstrepen, K.J., Jansen, A., Lewitter, F., and Fink, G.R. (2005). Intragenic tandem repeats generate  
1179 functional variability. *Nat Genet* 37, 986-990. 10.1038/ng1618.
- 1180 Vivancos, R., Anderson, C., Blomquist, P., Balasegaram, S., Bell, A., Bishop, L., Brown, C.S.,  
1181 Chow, Y., Edeghere, O., Florence, I., et al. (2022). Community transmission of monkeypox in the  
1182 United Kingdom, April to May 2022. *Euro Surveill* 27, 2200422. 10.2807/1560-  
1183 7917.ES.2022.27.22.2200422.

- 1184 Vusirikala, A., Charles, H., Balasegaram, S., Macdonald, N., Kumar, D., Barker-Burnside, C.,  
1185 Cumiskey, K., Dickinson, M., Watson, M., Olufon, O., et al. (2022). Epidemiology of early  
1186 monkeypox virus transmission in sexual networks of gay and bisexual men, England, 2022. *Emerg*  
1187 *Infect Dis* 28, 2082-2086. [10.3201/eid2810.220960](https://doi.org/10.3201/eid2810.220960).
- 1188 Walker, B.J., Abeel, T., Shea, T., Priest, M., Abouelliel, A., Sakthikumar, S., Cuomo, C.A., Zeng, Q.,  
1189 Wortman, J., Young, S.K., and Earl, A.M. (2014). Pilon: an integrated tool for comprehensive  
1190 microbial variant detection and genome assembly improvement. *PLoS One* 9, e112963.  
1191 [10.1371/journal.pone.0112963](https://doi.org/10.1371/journal.pone.0112963).
- 1192 Wang, D., Tao, R., Li, Z., Pan, D., Wang, Z., Li, C., and Shi, Y. (2020). STRsearch: a new pipeline  
1193 for targeted profiling of short tandem repeats in massively parallel sequencing data. *Hereditas* 157, 8.  
1194 [10.1186/s41065-020-00120-6](https://doi.org/10.1186/s41065-020-00120-6).
- 1195 Waterhouse, A.M., Procter, J.B., Martin, D.M.A., Clamp, M., and Barton, G.J. (2009). Jalview  
1196 Version 2—a multiple sequence alignment editor and analysis workbench. *Bioinformatics* 25, 1189-  
1197 1191. [10.1093/bioinformatics/btp033](https://doi.org/10.1093/bioinformatics/btp033).
- 1198 Wick, R.R., Judd, L.M., Gorrie, C.L., and Holt, K.E. (2017). Completing bacterial genome  
1199 assemblies with multiplex MinION sequencing. *Microb Genom* 3, e000132. [10.1099/mgen.0.000132](https://doi.org/10.1099/mgen.0.000132).
- 1200 Wittek, R., and Moss, B. (1980). Tandem repeats within the inverted terminal repetition of vaccinia  
1201 virus DNA. *Cell* 21, 277-284. [10.1016/0092-8674\(80\)90135-x](https://doi.org/10.1016/0092-8674(80)90135-x).
- 1202 Wood, D.E., Lu, J., and Langmead, B. (2019). Improved metagenomic analysis with Kraken 2.  
1203 *Genome Biol* 20, 257. [10.1186/s13059-019-1891-0](https://doi.org/10.1186/s13059-019-1891-0).
- 1204 World Health Organization (2022a). ICD-11. International Classification of Diseases 11th Revision.  
1205 <https://icd.who.int/en/>.
- 1206 World Health Organization (2022b). Monkeypox: experts give virus variants new names.  
1207 <https://www.who.int/news/item/12-08-2022-monkeypox--experts-give-virus-variants-new-names>.

1208 Yong, S.E.F., Ng, O.T., Ho, Z.J.M., Mak, T.M., Marimuthu, K., Vasoo, S., Yeo, T.W., Ng, Y.K.,  
1209 Cui, L., Ferdous, Z., et al. (2020). Imported monkeypox, Singapore. *Emerg Infect Dis* 26, 1826-1830.  
1210 10.3201/eid2608.191387.  
1211 Zhu, X., Jiang, L., Lu, Y., Wang, C., Zhou, S., Wang, H., and Tian, T. (2018). Association of aspartic  
1212 acid repeat polymorphism in the asporin gene with osteoarthritis of knee, hip, and hand: a PRISMA-  
1213 compliant meta-analysis. *Medicine (Baltimore)* 97, e0200. 10.1097/MD.0000000000010200.  
1214

| Name  | Location start <sup>a</sup> | Location end <sup>b</sup> | Repeat unit <sup>c</sup> | Pattern <sup>d</sup>                                                                                                                                       | Nearest OPG <sup>e</sup> | Type of LCR <sup>f</sup> | Relative position to the OPG <sup>e</sup> | Distance in bp <sup>h</sup> | Copenhagen notation <sup>i</sup> | Vaccinia virus (VACV) notation <sup>j</sup> | Comments                                       |
|-------|-----------------------------|---------------------------|--------------------------|------------------------------------------------------------------------------------------------------------------------------------------------------------|--------------------------|--------------------------|-------------------------------------------|-----------------------------|----------------------------------|---------------------------------------------|------------------------------------------------|
| LCR1  | 5,369                       | 5,624                     | 16                       | [AACTAAGTATGACTT] <sub>n</sub>                                                                                                                             | OPG003 (ITR)             | STR                      | Downstream                                | 72                          | Cop-C19L                         | NA                                          |                                                |
| LCR1  |                             |                           |                          |                                                                                                                                                            | OPG015 (ITR)             | STR                      | Upstream                                  | 35                          | CPXV-017                         | NA                                          |                                                |
| LCR2  | 174,063                     | 174,112                   | 2                        | [ATAT] <sub>n</sub>                                                                                                                                        | NA                       | STR                      | Downstream                                | 46                          | Cop-B16R                         | B14R                                        |                                                |
| LCR3  | 179,872                     | 180,345                   | 9                        | ATAT [ACATTATAT] <sub>n</sub>                                                                                                                              | OPG208                   | STR                      | ATG Start/Promoter                        | 21                          | Cop-K2L                          | B19R                                        | SPI-1 apoptosis inhibition                     |
| LCR4  | 193,504                     | 193,759                   | 16                       | [AAGTCATAAGTTAGTT] <sub>n</sub>                                                                                                                            | OPG003 (ITR)             | STR                      | Downstream                                | 72                          | Cop-C19L                         | NA                                          |                                                |
| LCR4  |                             |                           |                          |                                                                                                                                                            | OPG015 (LITR)            | STR                      | Upstream                                  | 35                          | CPXV-017                         | NA                                          |                                                |
| LCR5  | 133,895                     | 133,918                   | 1                        | [T] <sub>n</sub>                                                                                                                                           | MPXVgp137                | homopolymer              | Upstream                                  | 889                         | Cop-A25L                         | A27L                                        | Fragmented gene area                           |
| LCR6  | 133,980                     | 133,989                   | 10                       | [CAATCTTCT] <sub>n</sub>                                                                                                                                   | MPXVgp137                | STR                      | Upstream                                  | 818                         | Cop-A25L                         | A27L                                        |                                                |
| LCR7  | 137,319                     | 137,375                   | 3                        | [ATC] <sub>n</sub>                                                                                                                                         | OPG153                   | STR                      | Inside ORF                                | NA                          | Cop-A28L                         | A26L                                        | Attachment MVs/laminin                         |
| LCR8  | 147,655                     | 147,718                   | 5+7                      | [ATATTTT] <sub>n</sub> [ATTTT] <sub>n</sub> [ATATTTT] <sub>n</sub> [ATTTT] <sub>n</sub> [ATATTTT] <sub>n</sub> [ATTTT] <sub>n</sub> [ATATTTT] <sub>n</sub> | OPG171                   | STR                      | Upstream                                  | 75                          | Cop-A42R                         | A42R                                        |                                                |
| LCR8  |                             |                           |                          |                                                                                                                                                            | OPG170                   | STR                      | Upstream                                  | 70                          | Cop-A41L                         | A41L                                        |                                                |
| LCR9  | 151,350                     | 151,417                   | 9                        | [TATGAAG] <sub>n</sub> [GATATGAT] <sub>n</sub> [GATATGATG] <sub>n</sub> [GATATGAT] <sub>n</sub>                                                            | OPG176                   | STR                      | Upstream                                  | 12                          | Cop-A46R                         | A47R                                        |                                                |
| LCR10 | 197,830                     | 197,842                   | 1                        | [T] <sub>n</sub>                                                                                                                                           | OPG001 (ITR)             | homopolymer              | Downstream                                | 225                         | NA                               | NA                                          |                                                |
| LCR11 | 1,286                       | 1,298                     | 1                        | [T] <sub>n</sub>                                                                                                                                           | OPG001 (ITR)             | homopolymer              | Downstream                                | 225                         | NA                               | NA                                          |                                                |
| LCR12 | 29,326                      | 29,364                    | 1                        | [A] <sub>n</sub>                                                                                                                                           | OPG044                   | homopolymer              | Inside ORF                                | NA                          | Cop-K7R                          | B15R                                        | C-terminal position                            |
| LCR13 | 76,896                      | 76,904                    | 1                        | [T] <sub>n</sub>                                                                                                                                           | OPG097                   | homopolymer              | Inside ORF                                | NA                          | Cop-L3L/L4R                      | L3L/L4R                                     |                                                |
| LCR14 | 81,658                      | 81,666                    | 1                        | [T] <sub>n</sub>                                                                                                                                           | OPG104                   | homopolymer              | Inside ORF                                | NA                          | Cop-J5L                          | L5L                                         | Essential for viral replication                |
| LCR15 | 140,911                     | 140,977                   | 9                        | [ATAACAATT] <sub>n</sub> [ATAATTGTT] <sub>n</sub> [ATAATAATT] <sub>n</sub> [ATAATTGTT] <sub>n</sub>                                                        | OPG159                   | STR                      | Inside ORF                                | NA                          | Cop-A31L                         | A33L                                        | PKR inhibitor candidate? / C-terminal position |
| LCR16 | 153,457                     | 153,465                   | 1                        | [A] <sub>n</sub>                                                                                                                                           | OPG180                   | homopolymer              | Upstream                                  | 15                          | Cop-A50R                         | A50R                                        |                                                |
| LCR17 | 163,979                     | 164,003                   | 4                        | [TAAC] <sub>n</sub>                                                                                                                                        | OPG188                   | STR                      | Downstream                                | 82                          | Cop-B2R                          | B4R                                         |                                                |
| LCR18 | 166,865                     | 166,920                   | 7                        | [AATAATT] <sub>n</sub>                                                                                                                                     | OPG190                   | STR                      | Downstream                                | 15                          | Cop-B5R                          | B6R                                         |                                                |
| LCR19 | 170,508                     | 170,563                   | 6                        | [GATACA] <sub>n</sub>                                                                                                                                      | OPG197                   | STR                      | Inside ORF                                | NA                          | Cop-B11R                         | B11R                                        | Hypothetical protein                           |
| LCR20 | 172,868                     | 172,876                   | 1                        | [T] <sub>n</sub>                                                                                                                                           | OPG199                   | homopolymer              | Downstream                                | 56                          | Cop-K2L                          | SPI-2/B12R                                  |                                                |
| LCR21 | 175,299                     | 175,357                   | 6                        | [GATGAA] <sub>n</sub>                                                                                                                                      | OPG204                   | STR                      | ATG Start/Promoter                        | NA                          | Cop-B19R                         | B16R                                        | Alternative ATG repeat start                   |

- <sup>a</sup> Nucleotide base coordinate in reference HQG (Genbank# OX044336)
- <sup>b</sup> Nucleotide base coordinate in reference HQG (Genbank# OX044336)
- <sup>c</sup> Number of repeat units in the HQG (Genbank# OX044336)
- <sup>d</sup> Description of the pattern of the LCR in representative MPXV, in which <sub>n</sub> is the number of repeats for this particular genome
- <sup>e</sup> Identification according to Senkevich et al. of nearest identified gene. New Notation
- <sup>f</sup> Type of LCR: short tandem repeats or homopolymer
- <sup>g</sup> Position of the LCR to the nearest gene
- <sup>h</sup> Distance of the LCR to the nearest gene
- <sup>i</sup> Notation of the gene in the VACV Copenhagen strain
- <sup>j</sup> Notation of the gene in the VACV Western Reserve strain

| Name  | Repeat Unit | Pattern HQ                                                                                                                                                 | Number of | Nearest Gene | Variation | Type of  | Entropy | Resolved        | Nanopore | MiSeq | NovaSeq | #      | #      |
|-------|-------------|------------------------------------------------------------------------------------------------------------------------------------------------------------|-----------|--------------|-----------|----------|---------|-----------------|----------|-------|---------|--------|--------|
| LCR4  | 16          | TAGTCATAAGTTAGTT [AAGTCATAAGTTAGTT] <sub>15</sub>                                                                                                          | 16        | OPG003 (ITR) | NR        | Length   | NA      | No <sup>*</sup> | Yes      | No    | No      | NA     | NA     |
| LCR3  | 9           | ATAT [ACATTATAT] <sub>52</sub>                                                                                                                             | 52        | OPG208       | Yes       | Length   | NA      | Yes             | Yes      | No    | No      | NA     | NA     |
| LCR1  | 16          | [AACTAACTTATGACTT] <sub>15</sub> AACTAACTTATGACTA                                                                                                          | 16        | OPG003 (ITR) | NR        | Length   | NA      | No <sup>*</sup> | Yes      | No    | No      | NA     | NA     |
| LCR2  | 2           | [AT] <sub>25</sub>                                                                                                                                         | 25        | NA           | Yes       | Length   | 1.66    | No              | Yes      | Yes   | Yes     | 768    | 90     |
| LCR5  | 1           | [T] <sub>24</sub>                                                                                                                                          | 24        | OPG152       | Yes       | Length   | 1.535   | Yes             | No       | No    | Yes     | NA     | 112    |
| LCR10 | 1           | [T] <sub>13</sub>                                                                                                                                          | 13        | OPG001 (ITR) | Yes       | Length   | 0.63    | No <sup>*</sup> | Yes      | No    | No      | 6,561  | 11,945 |
| LCR11 | 1           | [T] <sub>13</sub>                                                                                                                                          | 13        | OPG001 (ITR) | Yes       | Length   | 0.627   | No <sup>*</sup> | Yes      | Yes   | Yes     | 6,448  | 11,589 |
| LCR21 | 6           | [GATGAA] <sub>4</sub> GATGA                                                                                                                                | 4.5       | OPG204       | Yes       | Mutation | 0.207   | Yes             | Yes      | Yes   | Yes     | 6,578  | 6,661  |
| LCR7  | 3           | [ATC] <sub>14</sub> TATGAT [ATC] <sub>3</sub>                                                                                                              | 19        | OPG153       | Yes       | Length   | 0.181   | Yes             | Yes      | Yes   | Yes     | 4,541  | 6,607  |
| LCR9  | 9           | [TATGAAG] <sub>1</sub> [GATATGAT] <sub>1</sub> [GATATGATG] <sub>5</sub> [GATATGAT] <sub>1</sub>                                                            | 8         | OPG176       | No        | NA       | 0       | Yes             | Yes      | Yes   | Yes     | 5,208  | 5,737  |
| LCR8  | 5+7         | [ATATTTT] <sub>1</sub> [ATTTT] <sub>1</sub> [ATATTTT] <sub>3</sub> [ATTTT] <sub>1</sub> [ATATTTT] <sub>2</sub> [ATTTT] <sub>1</sub> [ATATTTT] <sub>1</sub> | 10        | OPG171       | No        | NA       | 0       | Yes             | Yes      | Yes   | Yes     | 6,581  | 6,790  |
| LCR6  | 10          | [CAATCTTCT] <sub>1</sub>                                                                                                                                   | 1         | OPG152       | Yes*      | NA       | 0       | No*             | Yes      | Yes   | Yes     | 4,884  | 12,930 |
| LCR20 | 1           | [T] <sub>9</sub>                                                                                                                                           | 9         | OPG199       | No        | NA       | 0       | Yes             | Yes      | Yes   | Yes     | 10,106 | 13,315 |
| LCR19 | 6           | GATTCA [GATACA] <sub>8</sub> GAT                                                                                                                           | 9.3       | OPG197       | No        | NA       | 0       | Yes             | Yes      | Yes   | yes     | 4,119  | 4,685  |
| LCR18 | 7           | [AATAATT] <sub>3</sub> AATAA                                                                                                                               | 3         | OPG190       | No        | NA       | 0       | Yes             | Yes      | Yes   | Yes     | 9,755  | 11,838 |
| LCR17 | 4           | [TAAC] <sub>6</sub> T                                                                                                                                      | 6.1       | OPG188       | No        | NA       | 0       | Yes             | Yes      | Yes   | Yes     | 7,388  | 9,474  |
| LCR16 | 1           | [A] <sub>9</sub>                                                                                                                                           | 9         | OPG180       | No        | NA       | 0       | Yes             | Yes      | Yes   | Yes     | 10,340 | 16,044 |
| LCR15 | 9           | [ATAACAATT] <sub>4</sub> [ATAATTGTT] <sub>1</sub> [ATAATAATT] <sub>1</sub> [ATAATTGTT] <sub>1</sub>                                                        | 7         | OPG159       | No        | NA       | 0       | Yes             | Yes      | Yes   | Yes     | 7,067  | 6,569  |
| LCR14 | 1           | [T] <sub>9</sub>                                                                                                                                           | 9         | OPG104       | No        | NA       | 0       | Yes             | Yes      | Yes   | Yes     | 7,819  | 12,521 |
| LCR13 | 1           | [T] <sub>9</sub>                                                                                                                                           | 9         | OPG097/098   | No        | NA       | 0       | Yes             | Yes      | Yes   | Yes     | 7,480  | 12,126 |
| LCR12 | 1           | [A] <sub>9</sub>                                                                                                                                           | 9         | OPG044       | No        | NA       | 0       | Yes             | Yes      | Yes   | Yes     | 9,789  | 13,592 |

\* LCR6 is a 10-bp repeat that was reported early in the outbreak as an insertion (<https://virological.org/t/first-german-genome-sequence-of-monkeypox-virus-associated-to-multi-country-outbreak-in-may-2022/812>). In our dataset, we have not seen any variation in this area.  
 & LCR pairs 1/4 and 10/11 are located in ITRs. Given that no read covering this area reached a unique are outside of the ITRs, we cannot technically state that we solved the repeat. Nonetheless, the ITRs should be identical based on the know poxvirid replication mode.



|                                            | <b>MPXV-<br/>M5312_HM12_Rivers</b> | <b>MPXV_USA_2022_MA001</b> | <b>353R</b> |
|--------------------------------------------|------------------------------------|----------------------------|-------------|
| <b>Genome length</b>                       | 197209                             | 197205                     | 198547      |
| <b>SNPs*</b>                               | NA                                 | 67                         | 69          |
| <b>Indels*</b>                             | NA                                 | 10del 7ins                 | 11del 6 ins |
| <b>Homopolymeric sites**</b>               | 408                                | 405                        | 399         |
| <b>Unique SNPs</b>                         | NA                                 | 0                          | 2           |
| <b>LCR characterization</b>                |                                    |                            |             |
| <b>LCR pair 1/4</b>                        | 8                                  | 8                          | 16          |
| <b>LCR2</b>                                | 22                                 | 24                         | 25          |
| <b>LCR3</b>                                | 18                                 | 16                         | 52          |
| <b>LCR5</b>                                | 25                                 | 28                         | 24          |
| <b>LCR6</b>                                | 2                                  | 1                          | 1           |
| <b>LCR7</b>                                | 19                                 | 17.6                       | 17.6        |
| <b>LCR8</b>                                | 10                                 | 10                         | 10          |
| <b>LCR9</b>                                | 8                                  | 6                          | 6           |
| <b>LCR pair 10/11</b>                      | 17                                 | 14                         | 13          |
| <b>LCR12</b>                               | 9                                  | 9                          | 9           |
| <b>LCR13</b>                               | 9                                  | 9                          | 9           |
| <b>LCR14</b>                               | 9                                  | 9                          | 9           |
| <b>LCR15</b>                               | 7                                  | 7                          | 7           |
| <b>LCR16</b>                               | 9                                  | 9                          | 9           |
| <b>LCR17</b>                               | 6.1                                | 6.1                        | 6.1         |
| <b>LCR18</b>                               | 3.5                                | 3.5                        | 3.5         |
| <b>LCR19</b>                               | 9.3                                | 9.3                        | 9.3         |
| <b>LCR20</b>                               | 9                                  | 9                          | 9           |
| <b>LCR21</b>                               | 4.5                                | 4.5                        | 4.5         |
| *SNPs and indels vs MPXV-M5312 HM12 Rivers |                                    |                            |             |
| ** Homopolymers >8 nt in length            |                                    |                            |             |

Figure 1

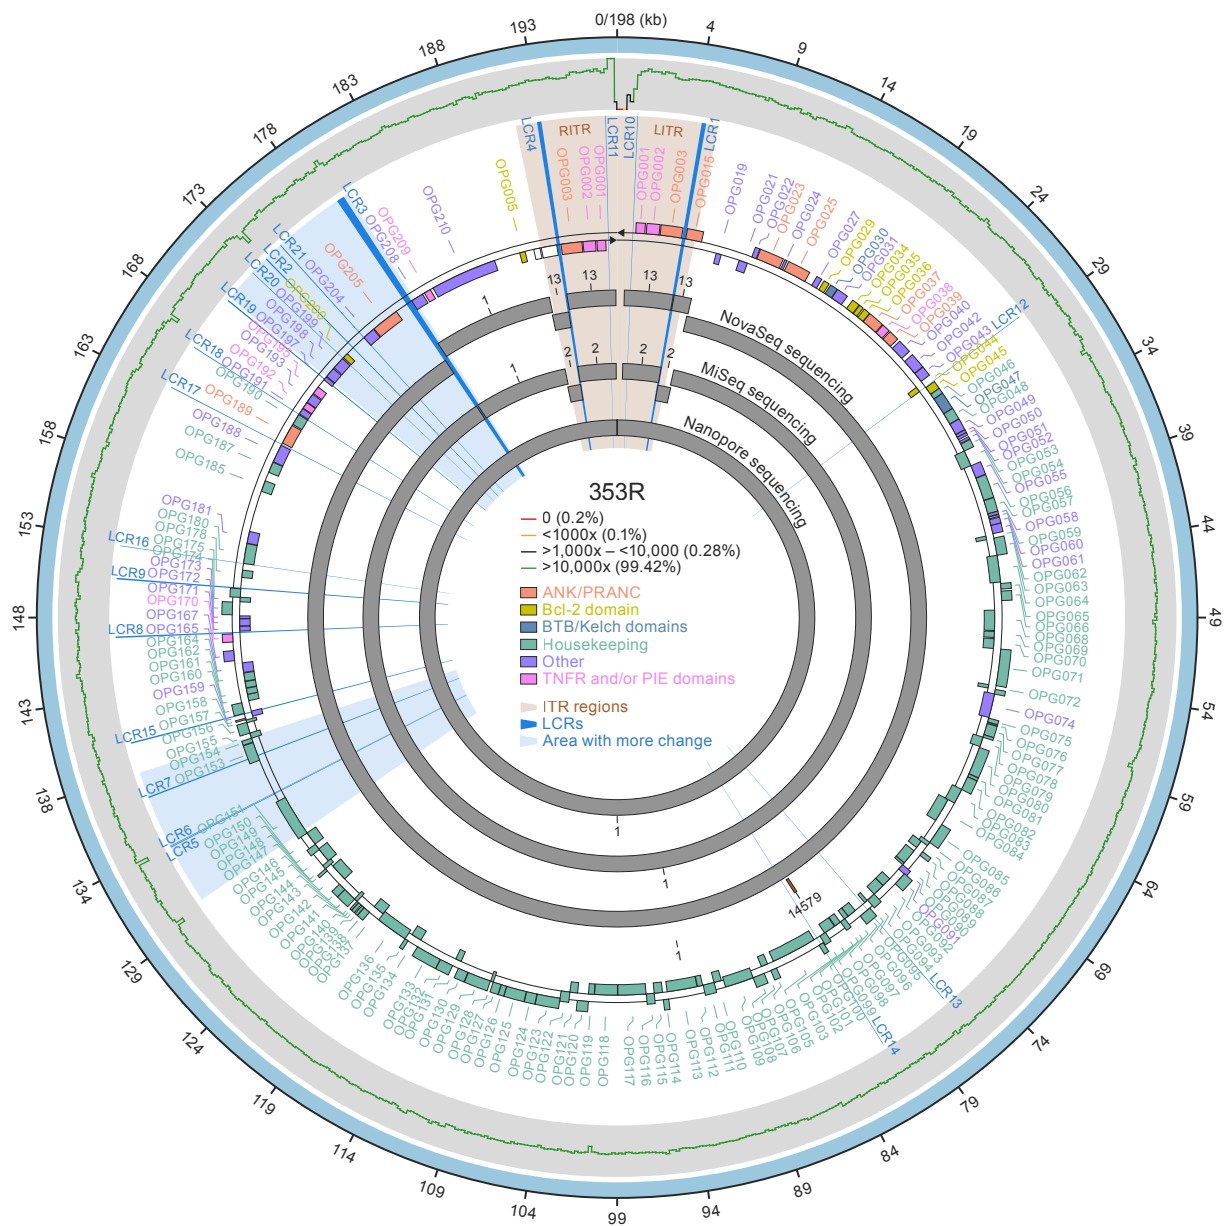

Figure 2

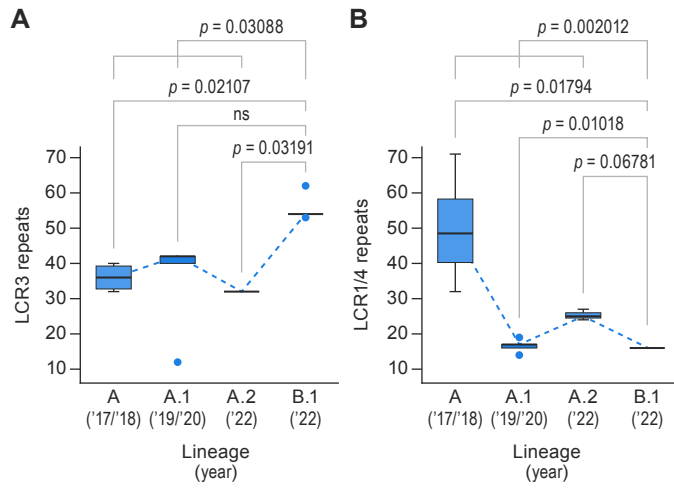

Figure 3

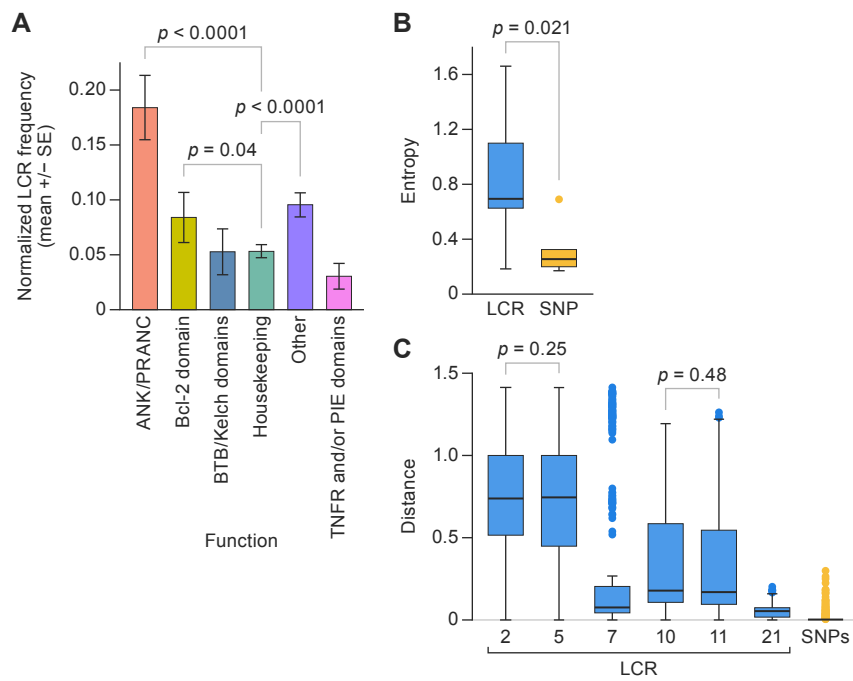

Figure 4

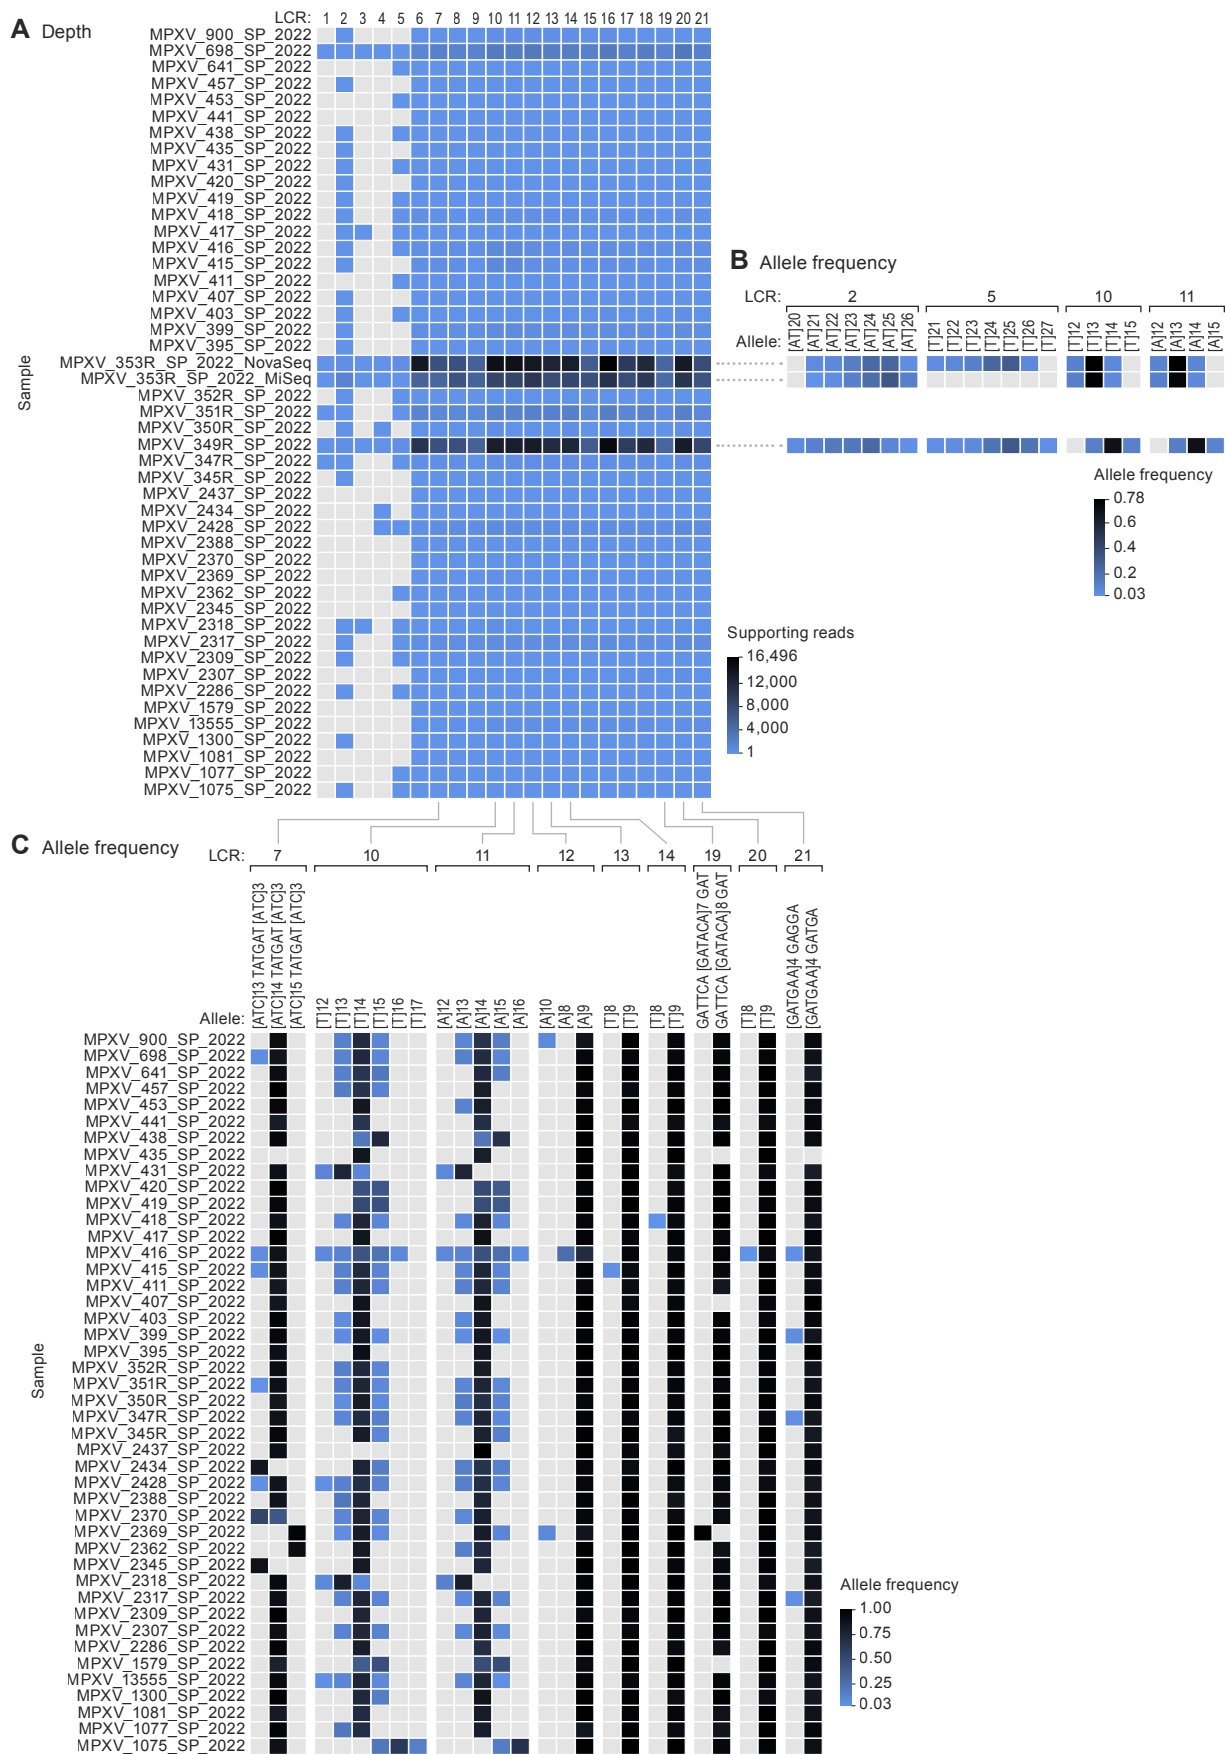

Figure 5

**A** OPG153

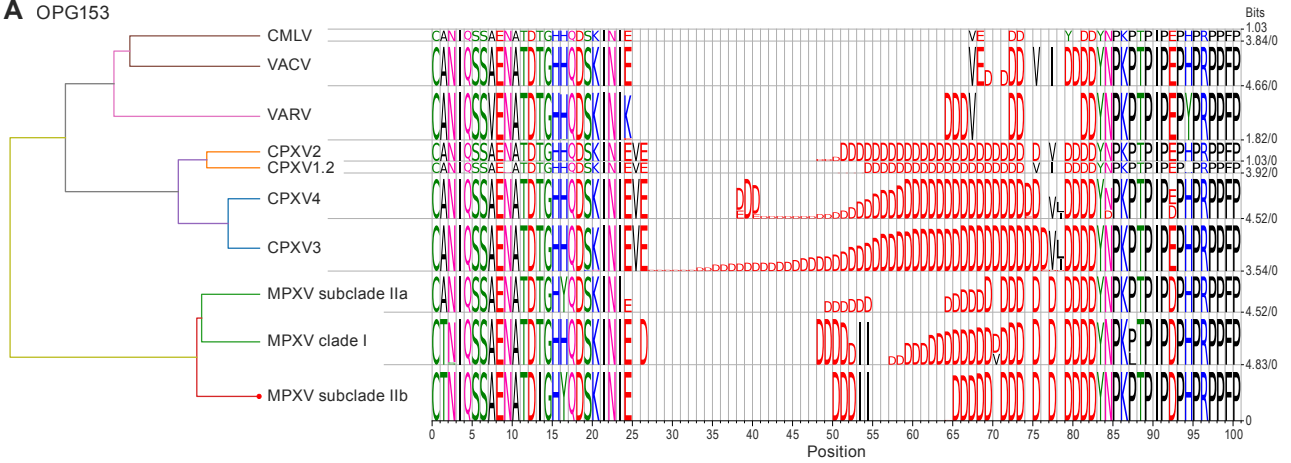

**C** OPG204

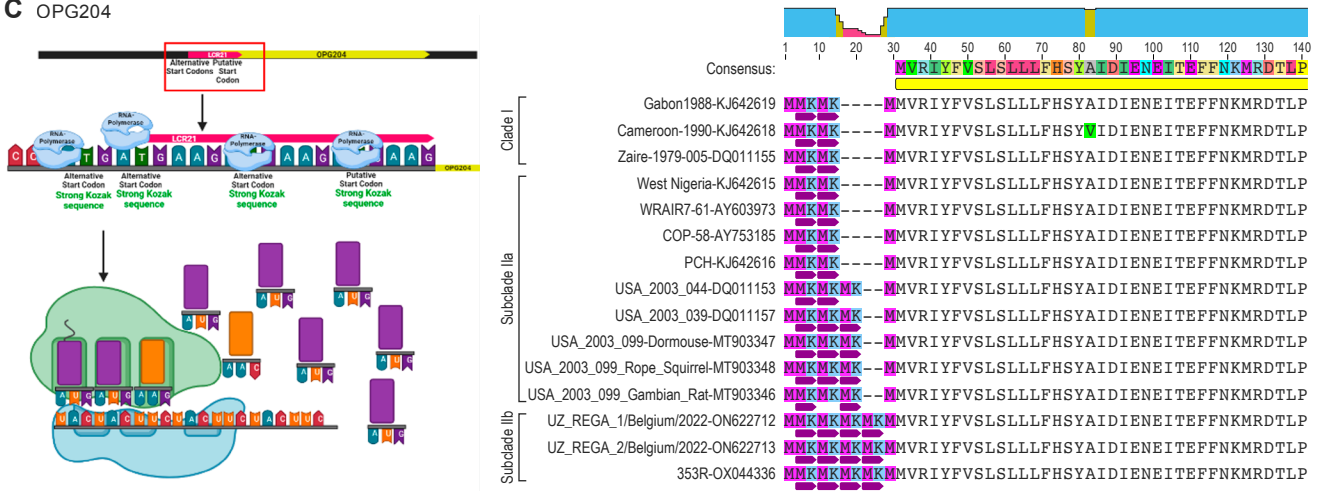

**B** OPG208

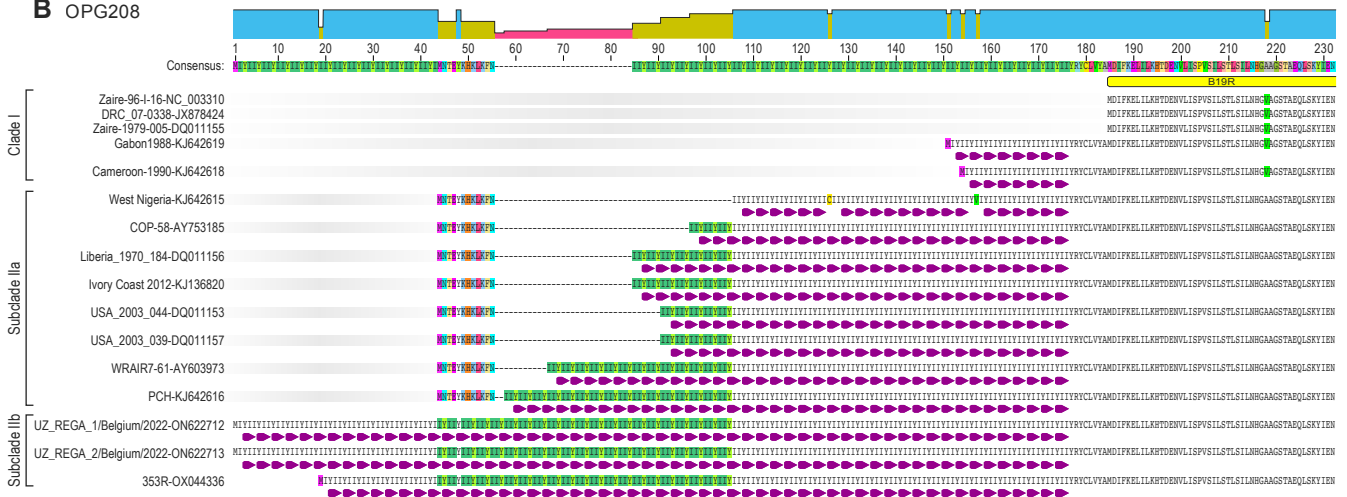

Source: https://www.biorxiv.org/content/10.1101/2022.09.30.510261.full.pdf
